# Supplementary material for: Highly efficient and general enantioselective synthesis of naturally occurring isoquinoline alkaloids
Source: Royal Society of Chemistry journal article supplement (doi:10.1039/c4qo00058g), 2014-01-01
Supplement: c4qo00058g1.pdf [file c4qo00058g1.pdf]

# Highly Efficient General Enantioselective Synthesis of Naturally Occurring Isoquinoline Alkaloids

Weilong Lin,<sup>a</sup> and Shengming Ma<sup>\*a,b</sup>

<sup>a</sup> State Key Laboratory of Organometallic Chemistry, Shanghai Institute of Organic Chemistry, Chinese Academy of Sciences, 345 Lingling Lu, Shanghai 200032, P. R. China

<sup>b</sup> Shanghai Key Laboratory of Green Chemistry and Chemical Process, Department of Chemistry, East China Normal University, 3663 North Zhongshan Road, Shanghai 200062, P. R. China

Email: [masm@sioc.ac.cn](mailto:masm@sioc.ac.cn)

Supporting Information

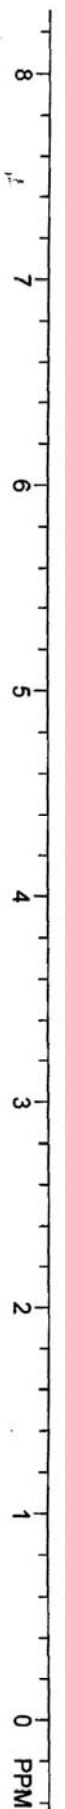

HW-3-118H-400M  
Jan 14 2014  
SOLVENT: CDCl3  
NA = 8

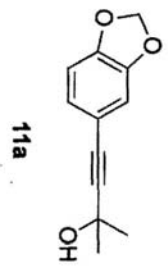

- 6.936
- 6.932
- 6.916
- 6.912
- 6.854
- 6.851
- 6.733
- 6.712

5.947

2.529

1.596

-0.000

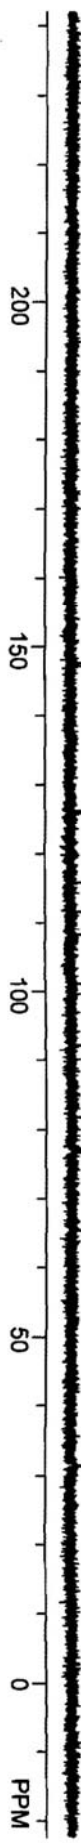

MI-3-118C-400M  
Jan 14 2014  
SOLVENT: cdcl3  
NA = 24

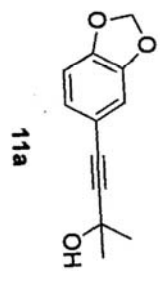

- 147.661
- 147.197
- 126.113
- 115.861
- 111.536
- 108.256
- 101.159
- 92.093
- 81.813
- 77.319
- 77.000
- 76.681
- 65.453
- 31.401

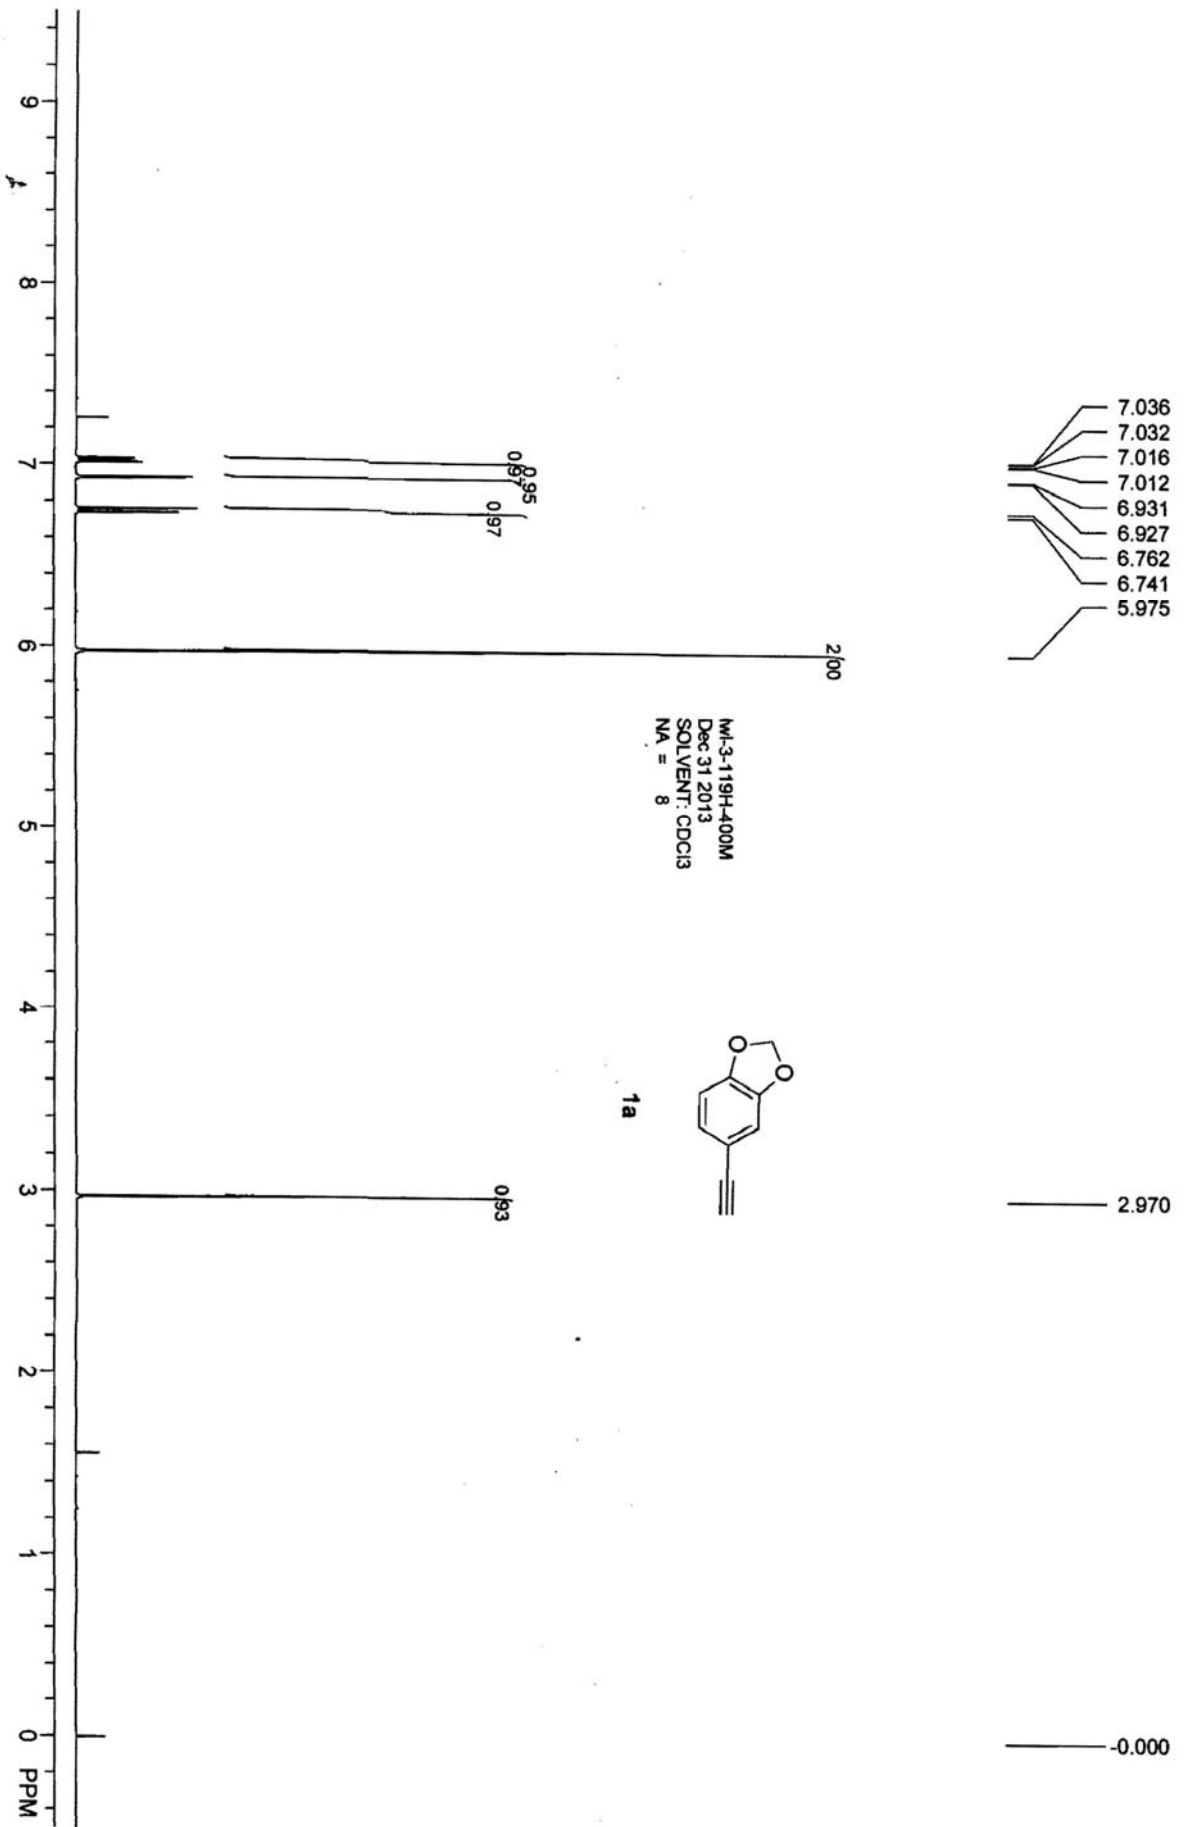

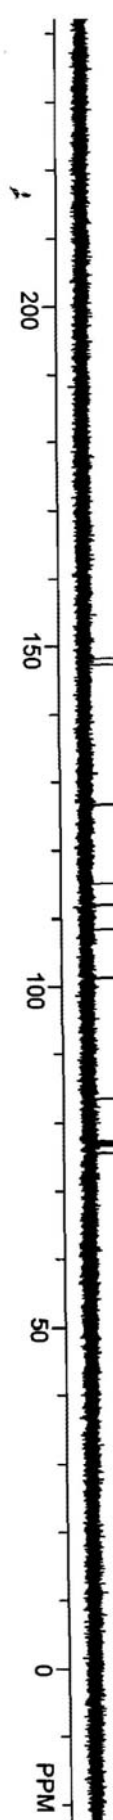

HWI-3-119C-400M  
Jan 14 2014  
SOLVENT: cdcl3  
NA = 40

1a

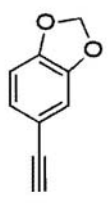

148.202  
147.290

126.807

115.183

111.947

108.353

101.300

83.488

77.319

77.000

76.685

75.552

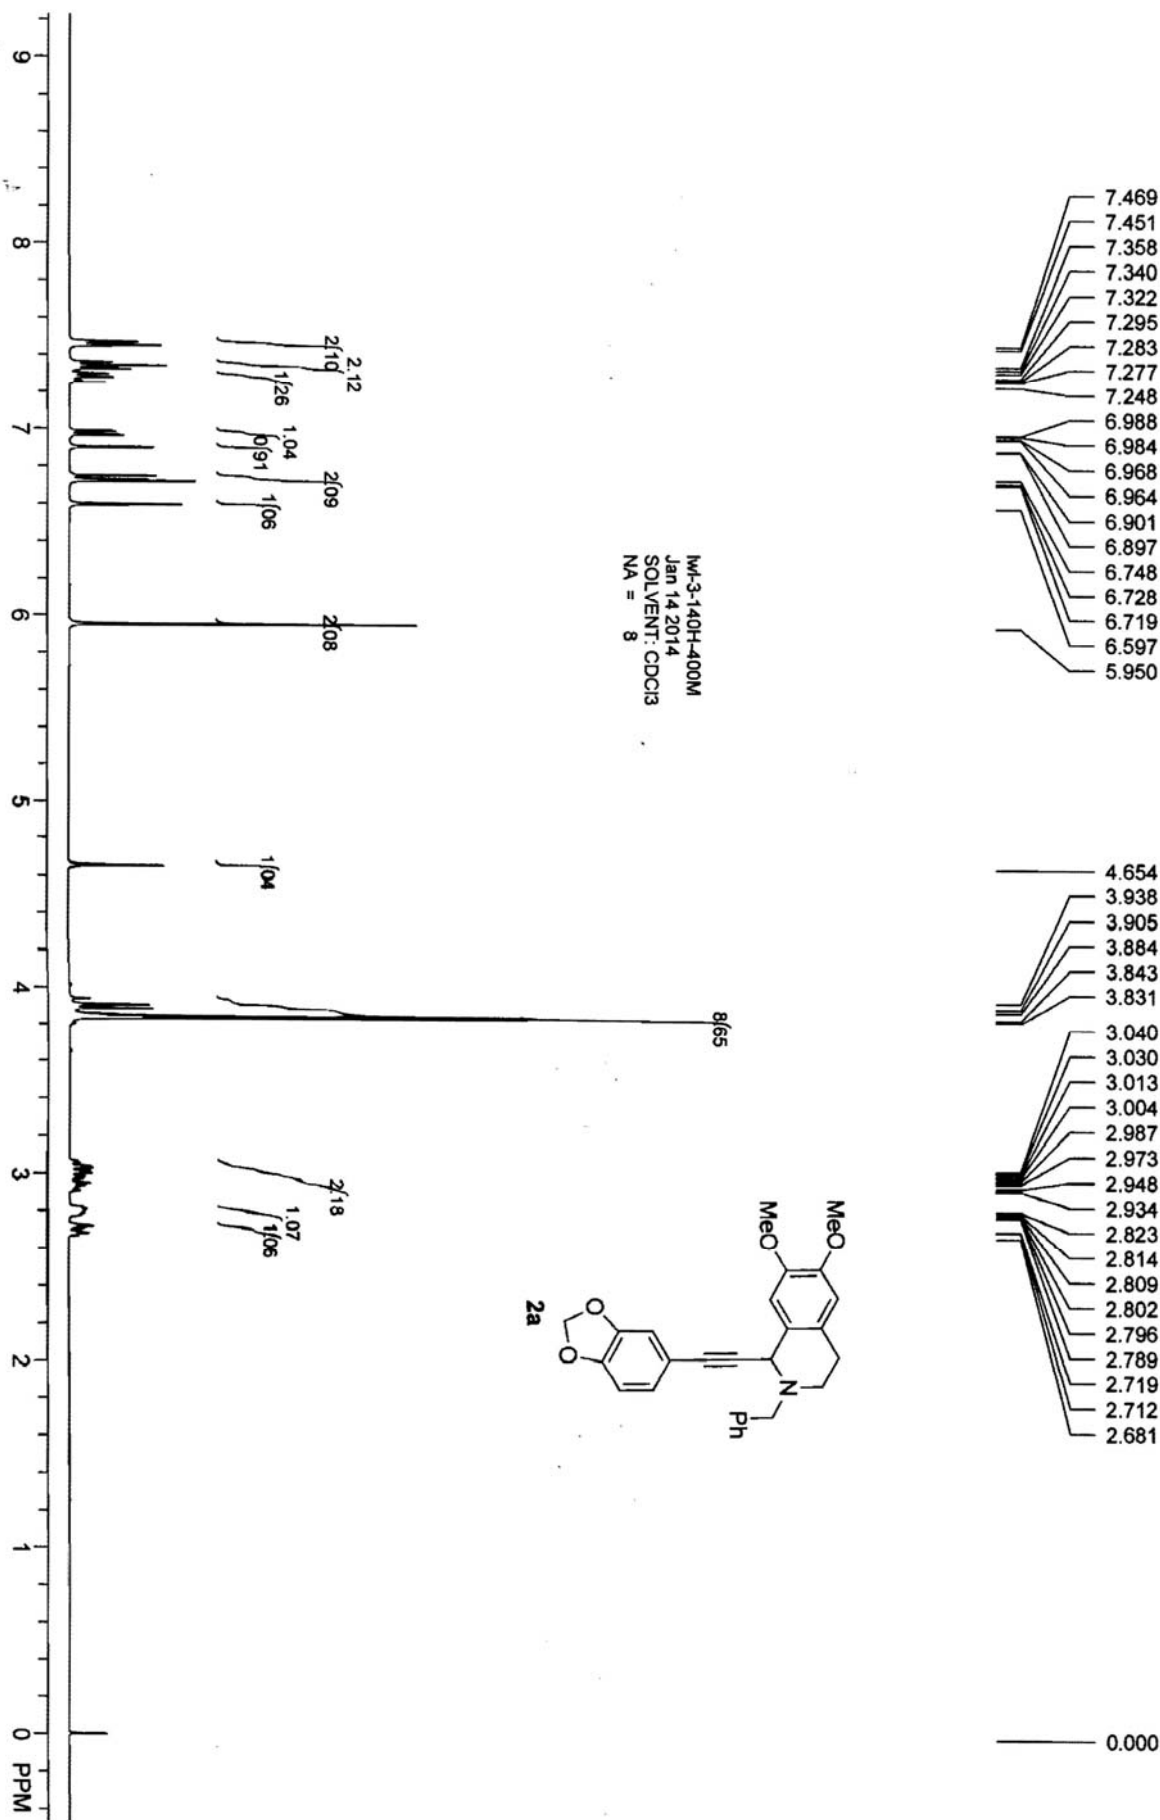

IM-3-140H-400M  
 Jan 14 2014  
 SOLVENT: CDCl3  
 NA = 8

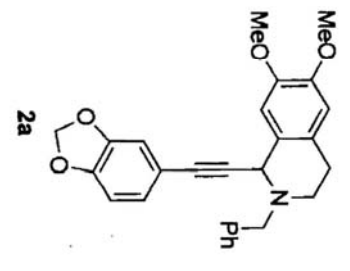

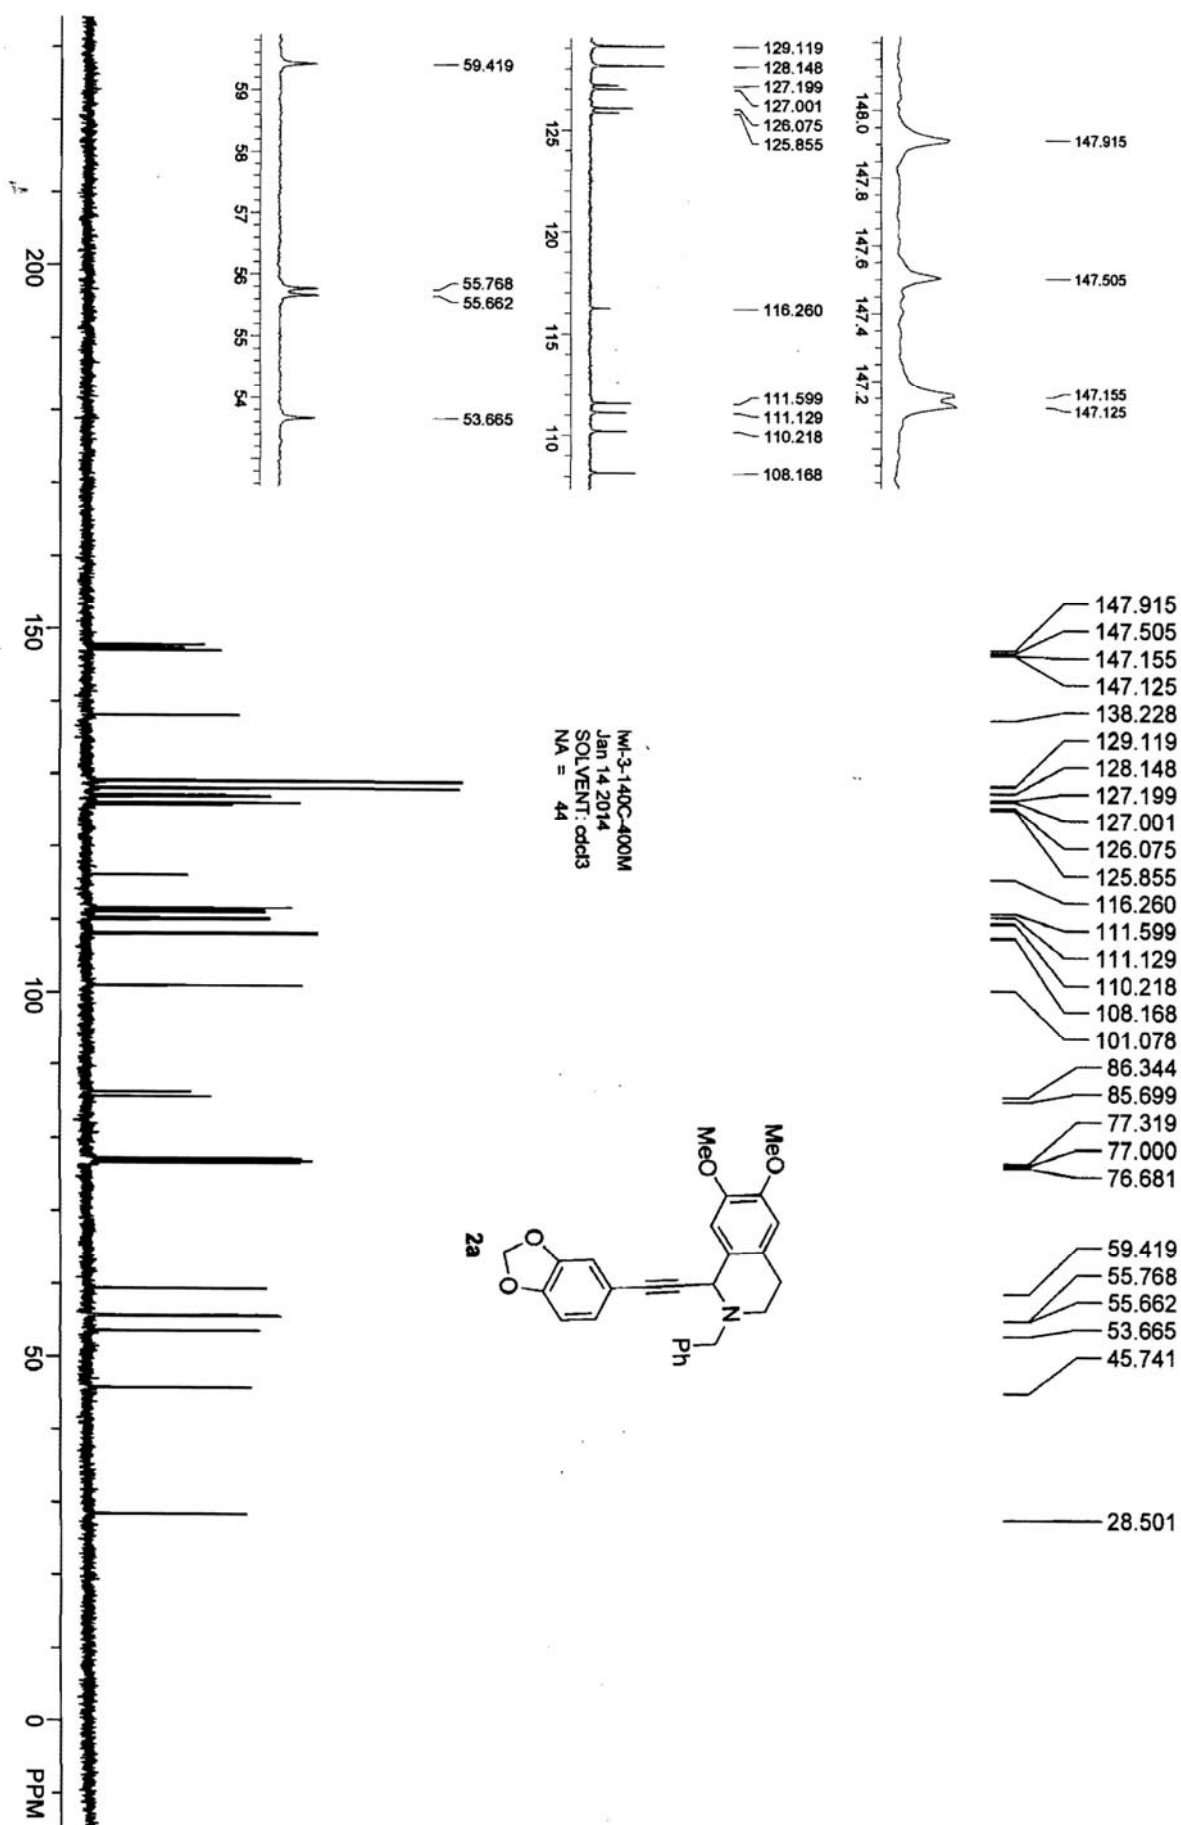

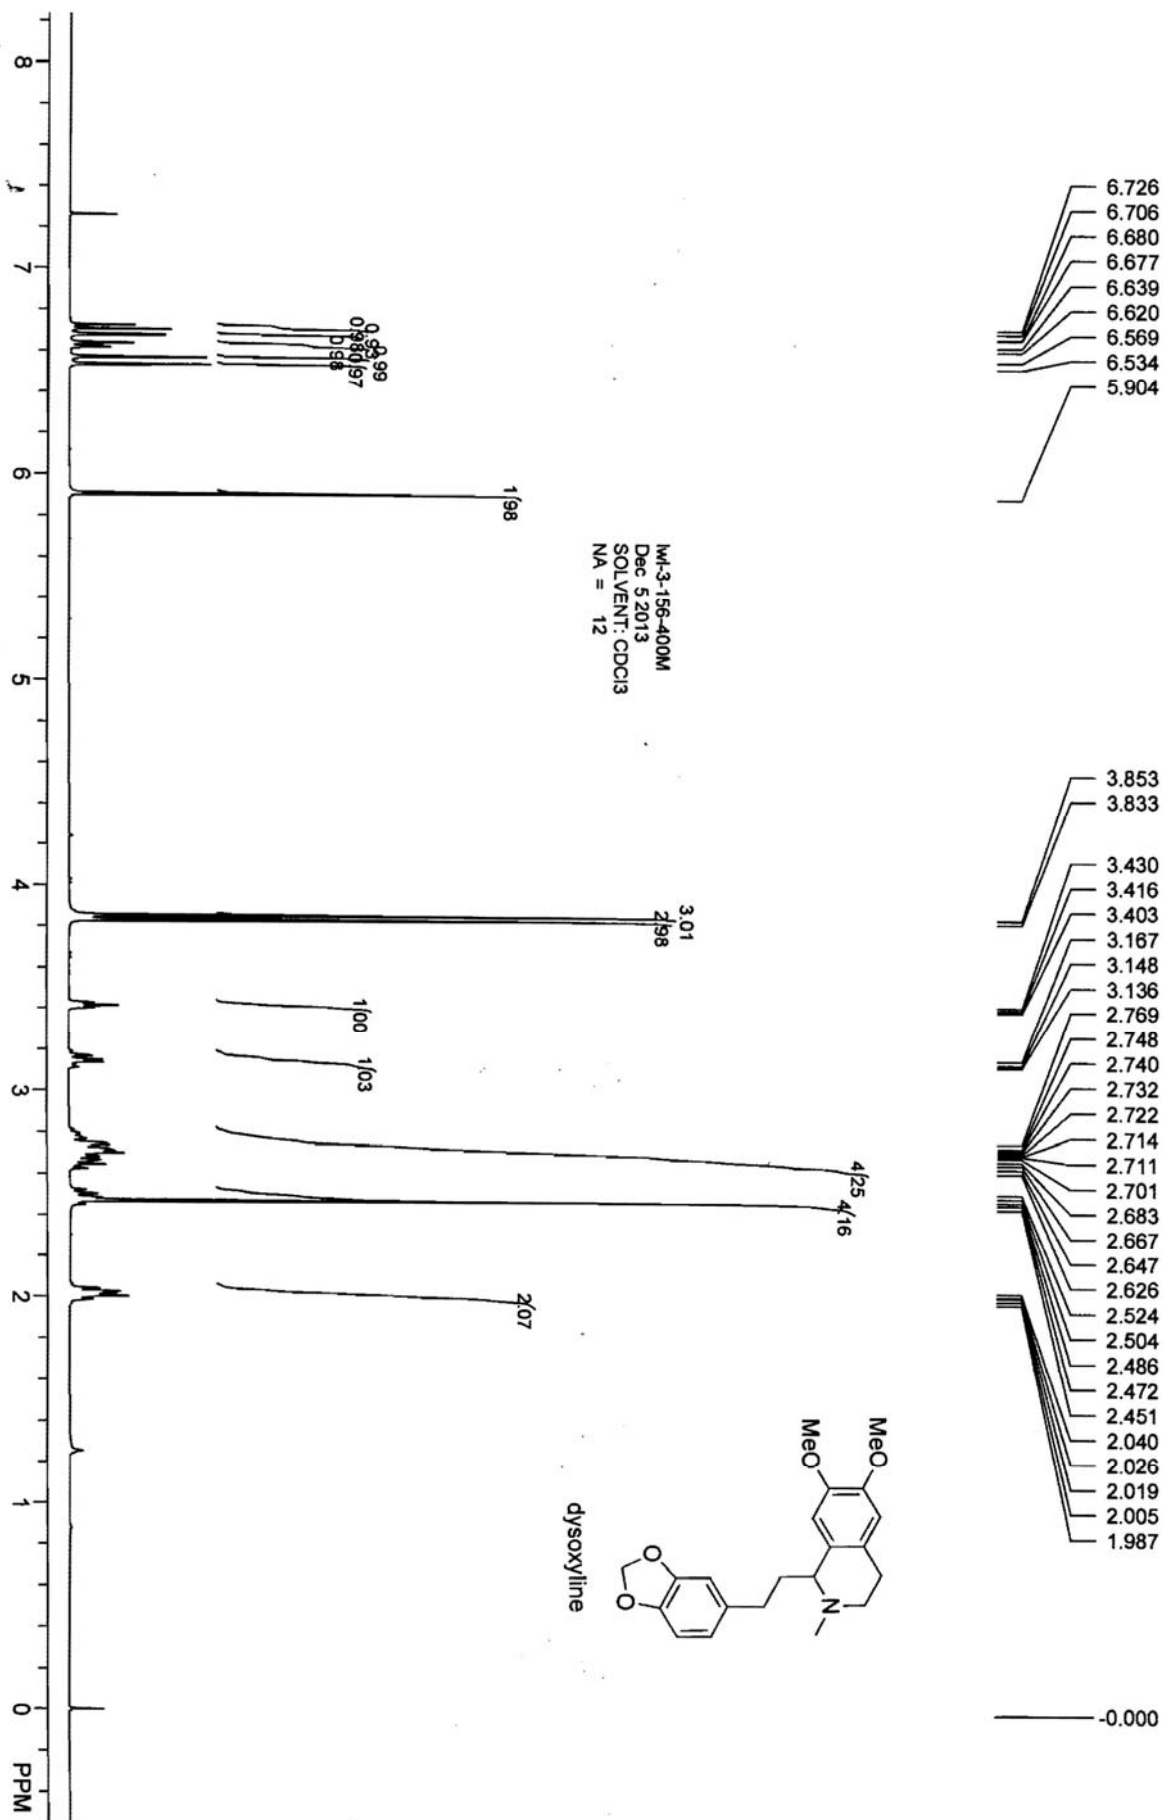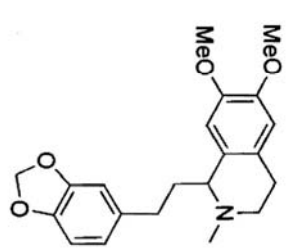

dysoxylone



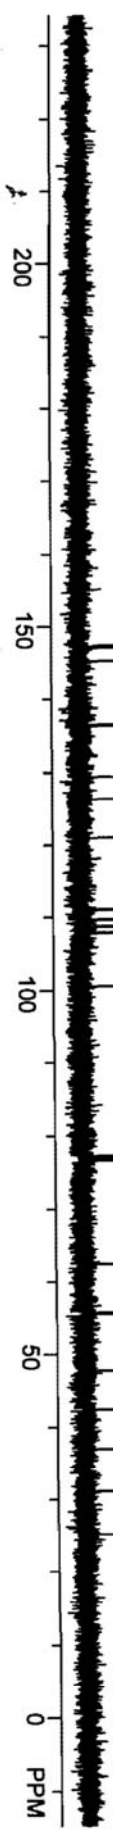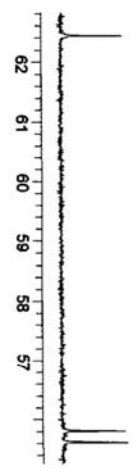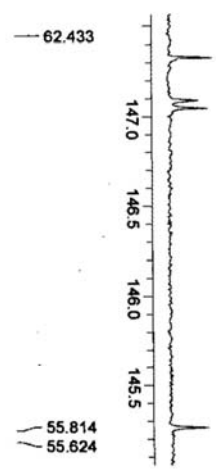

147.330  
147.095  
147.049

145.265

NI-3-156C-100M  
Jan. 13 2014  
SOLVENT: cdcl3  
NA = 48

- 147.330
- 147.095
- 147.049
- 145.265
- 136.536
- 129.362
- 126.371
- 120.929
- 111.023
- 109.687
- 108.791
- 107.963
- 100.562

- 77.319
- 77.000
- 76.681

- 62.433
- 55.814
- 55.624
- 47.866
- 42.469
- 36.981
- 31.174
- 25.161

dysoxylone

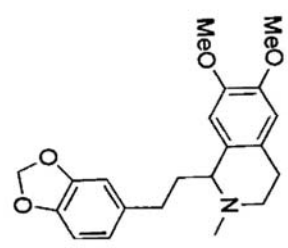

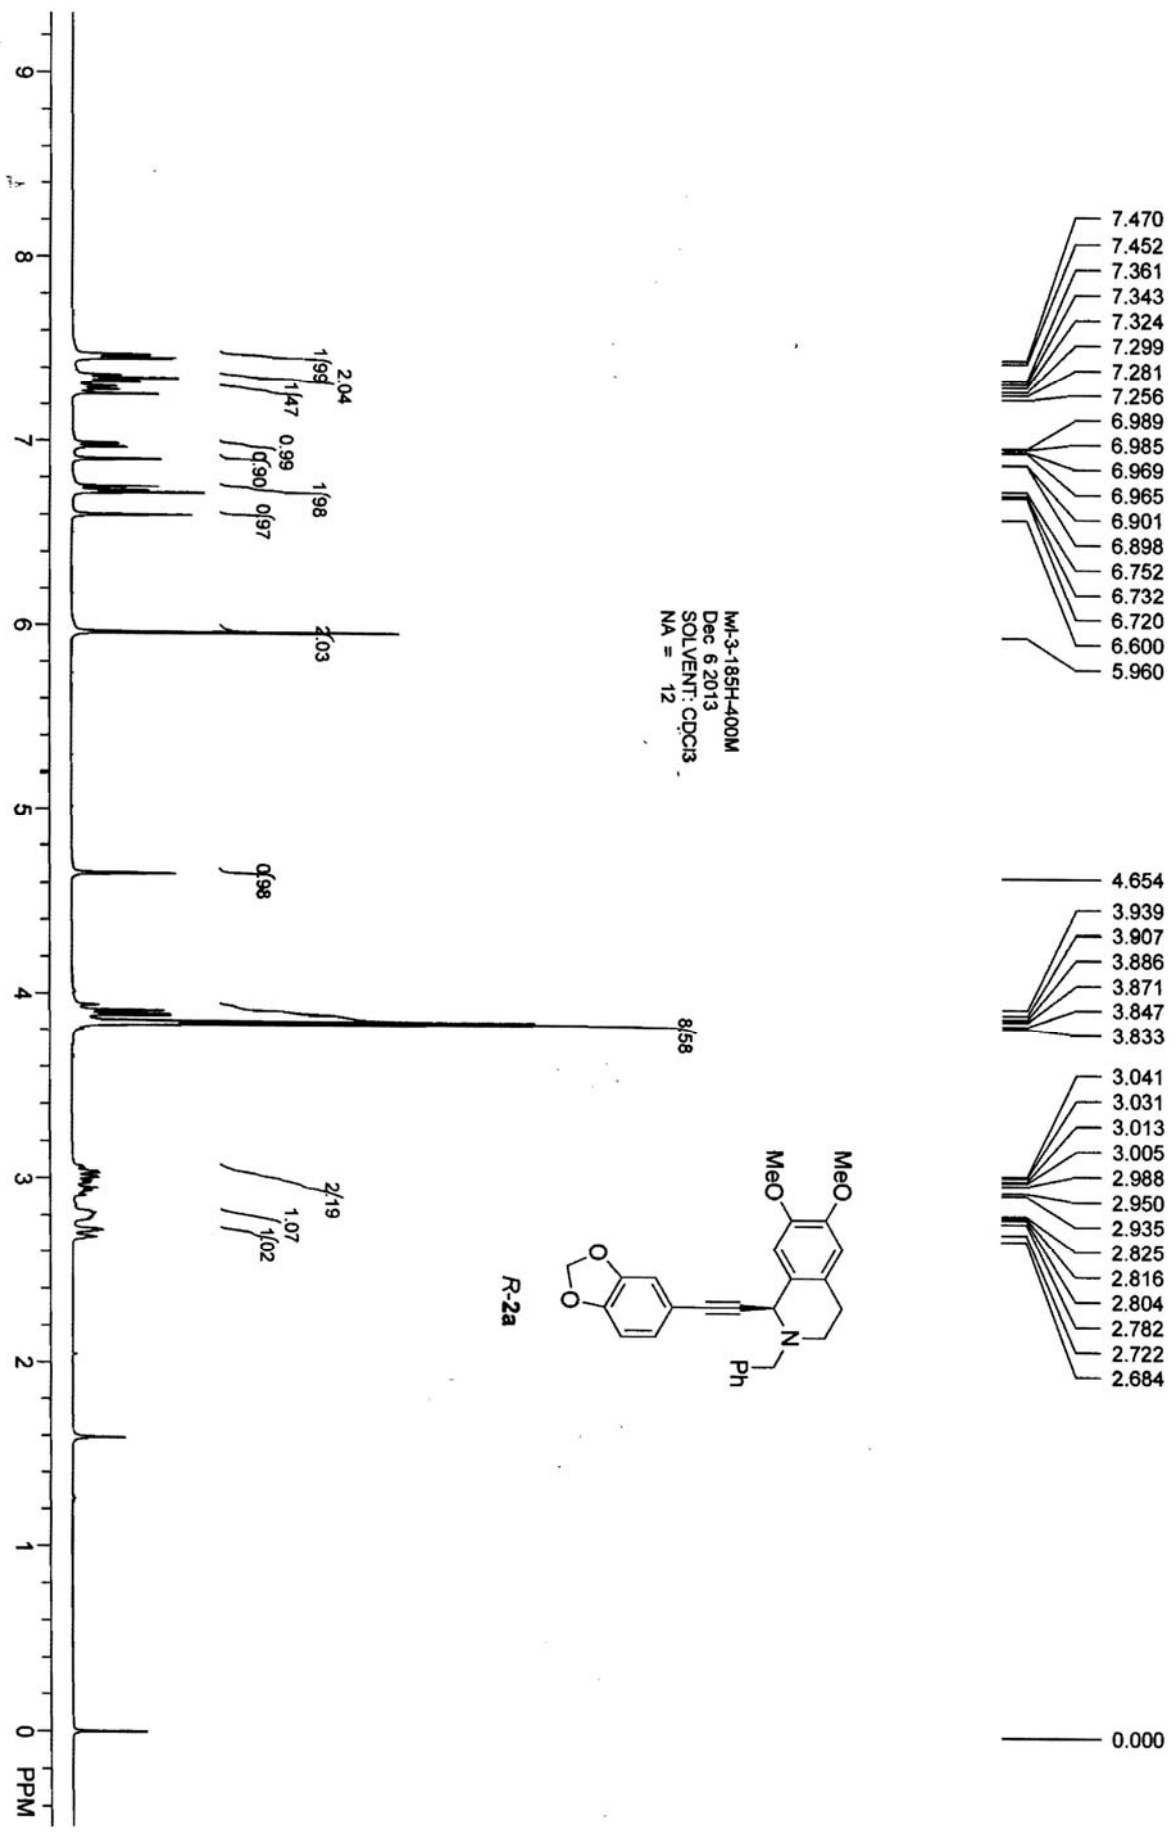

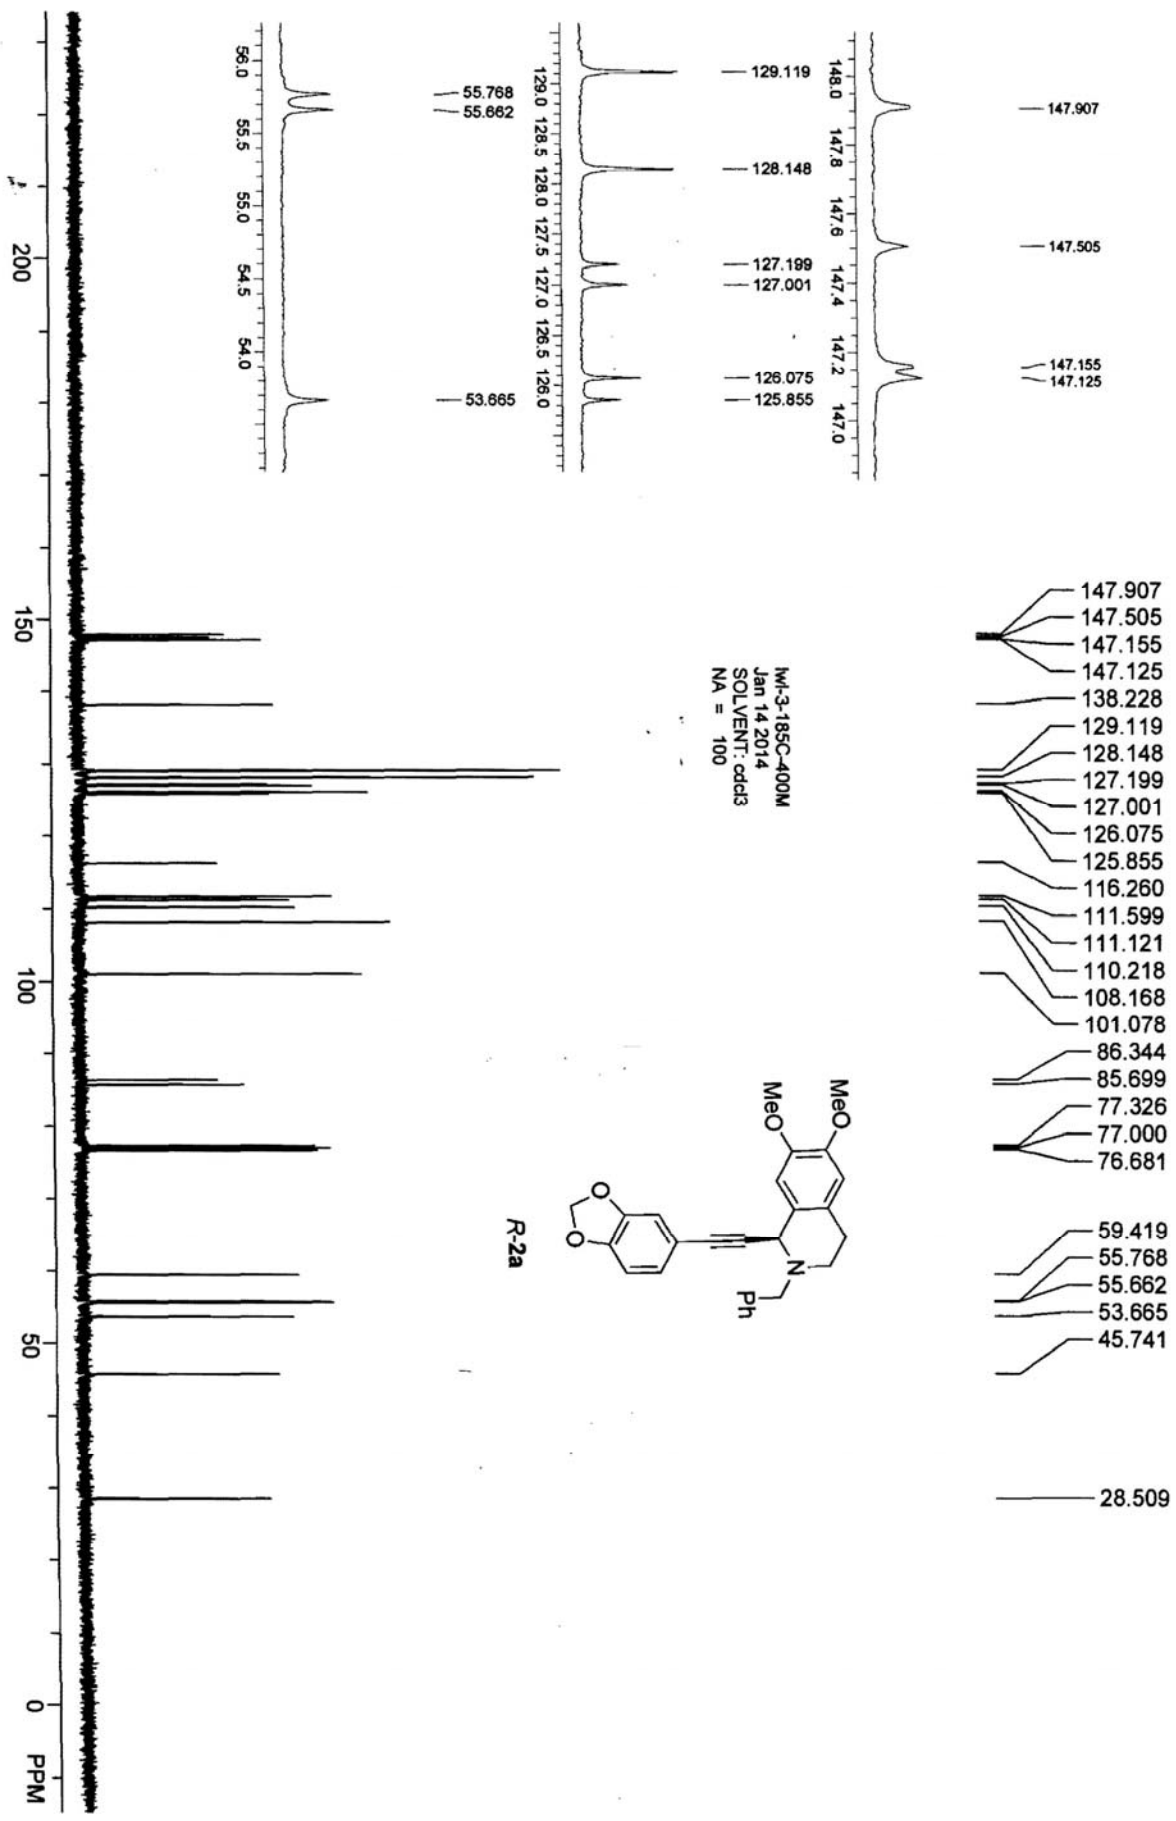

中国科学院上海有机化学研究所

Project Name: defaults for copy

Reported by User: Breeze user (Breeze)

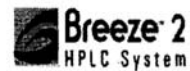

### SAMPLE INFORMATION

Sample Name: lw-3-185-odh-95-5-1-214

Acquired By: Breeze

Sample Type: 未知

Date Acquired: 2013/12/6 16:33:32 CST

Vial: 1

Acq Method: zg95

Injection #: 71

Date Processed: 2013/12/6 17:49:55 CST

Injection Volume: 10.00  $\mu$ l

Channel Name: V0489 ChA

Run Time: 60.00 Minutes

Sample Set Name:

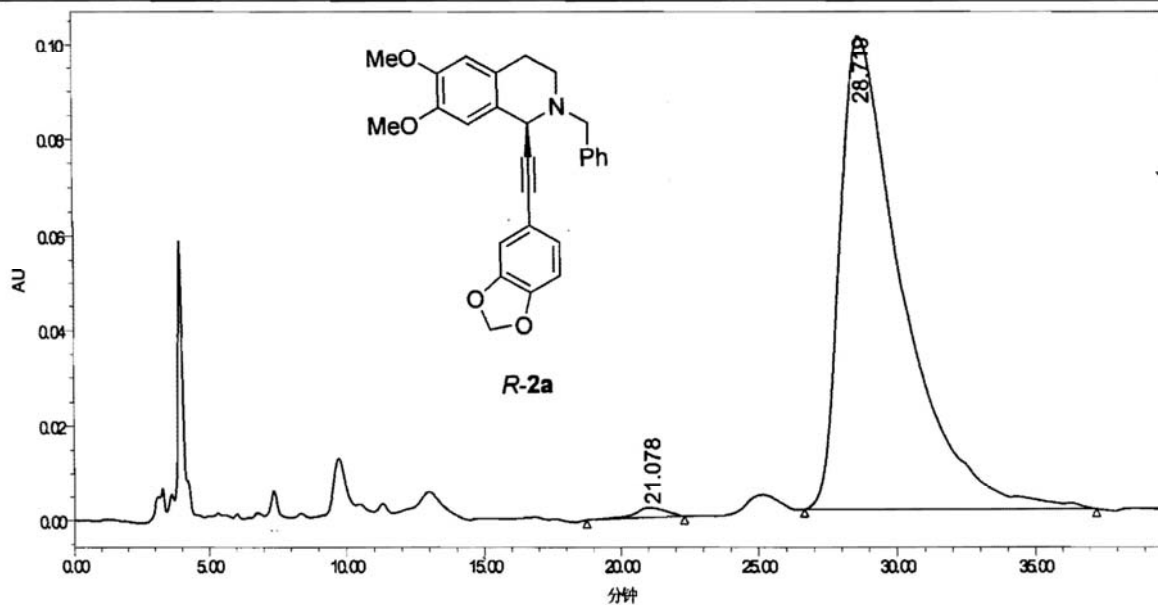

|   | RT (min) | Area (峰面积) | %Area | Height (峰高) | % Height |
|---|----------|------------|-------|-------------|----------|
| 1 | 21.078   | 172051     | 1.10  | 2095        | 2.08     |
| 2 | 28.719   | 15531511   | 98.90 | 99447       | 97.94    |

Report Method: 无标题

Page: 1 (共 1)

Printed: 2013/12/6

16:55:11 FFC

**SAMPLE INFORMATION**

|                   |                          |                  |                         |
|-------------------|--------------------------|------------------|-------------------------|
| Sample Name:      | lw-3-165-cd-h-95-5-1-214 | Acquired By:     | Breeze                  |
| Sample Type:      | 未知                       | Date Acquired:   | 2013/12/16 17:15:12 CST |
| Vial:             | 1                        | Acq. Method:     | zg95                    |
| Injection #:      | 72                       | Date Processed:  | 2013/12/16 17:53:49 CST |
| Injection Volume: | 10.00 ul                 | Channel Name:    | V2489 ChA               |
| Run Time:         | 60.00 Minutes            | Sample Set Name: |                         |

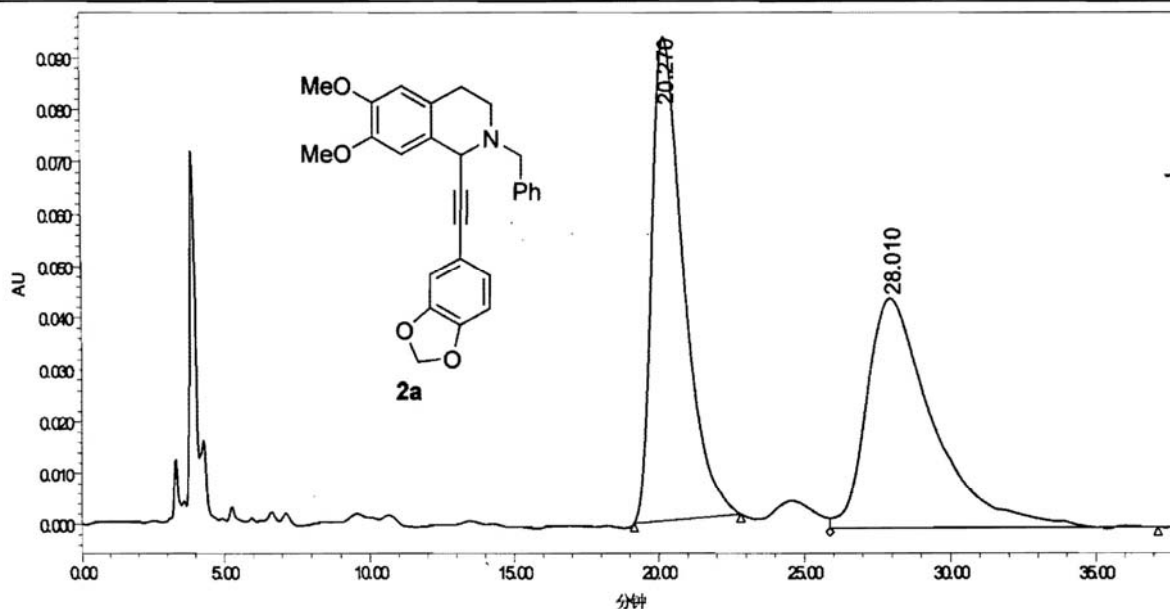

|   | RT (min) | Area (峰sec) | %Area | Height (峰) | % Height |
|---|----------|-------------|-------|------------|----------|
| 1 | 20.270   | 7136475     | 50.44 | 93479      | 67.79    |
| 2 | 28.010   | 7011183     | 49.56 | 44421      | 32.21    |



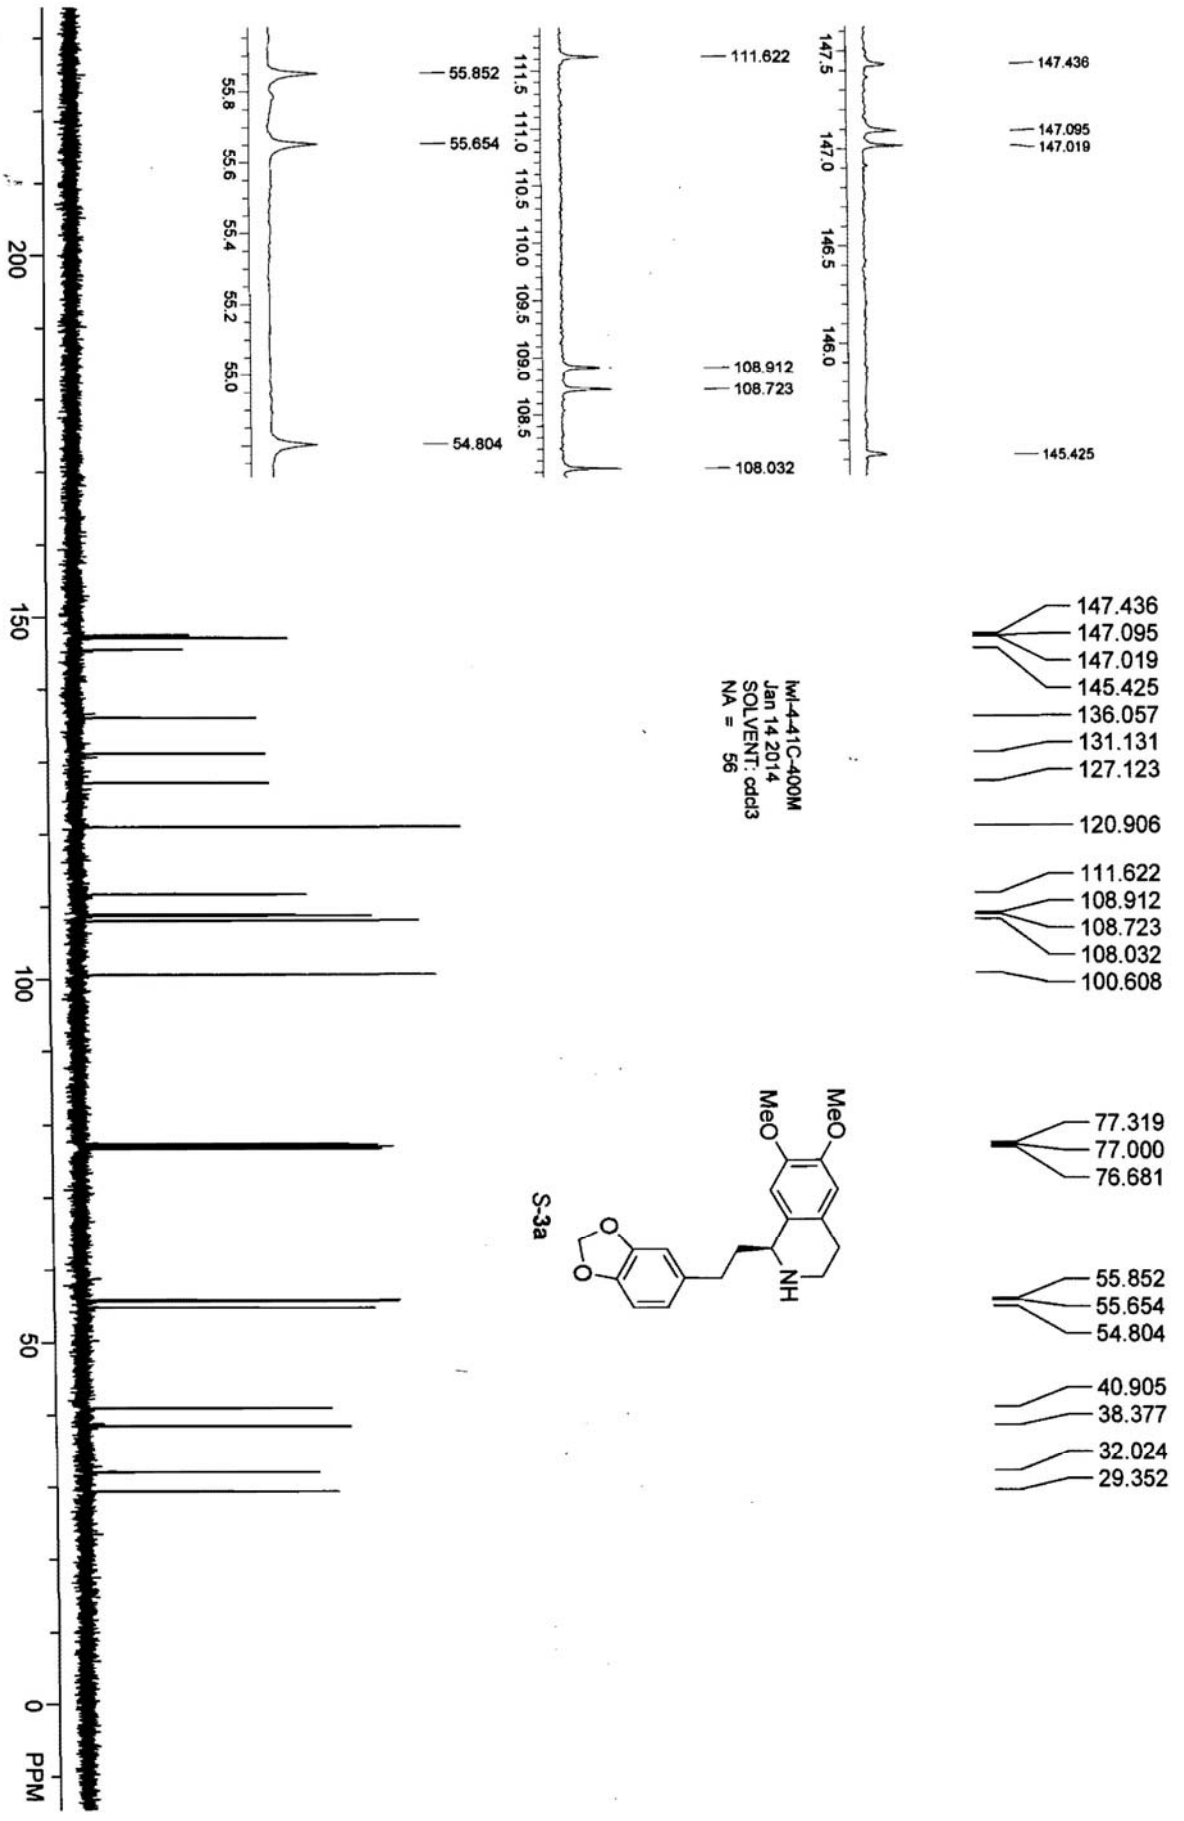





中国科学院上海有机化学研究所

Project Name: defaults for copy

Reported by User: Breeze user (Breeze)

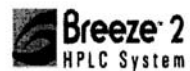

### SAMPLE INFORMATION

Sample Name: lw-4-41-cd-h-60-40-1-214

Sample Type: 未知

Vial: 1

Injection #: 48

Injection Volume: 10.00  $\mu$ l

Run Time: 60.00 Minutes

Acquired By: Breeze

Date Acquired: 2014/1/10 12:05:01 CST

Acq. Method: zg60

Date Processed: 2014/1/10 16:24:51 CST

Channel Name: V2489 CHA

Sample Set Name:

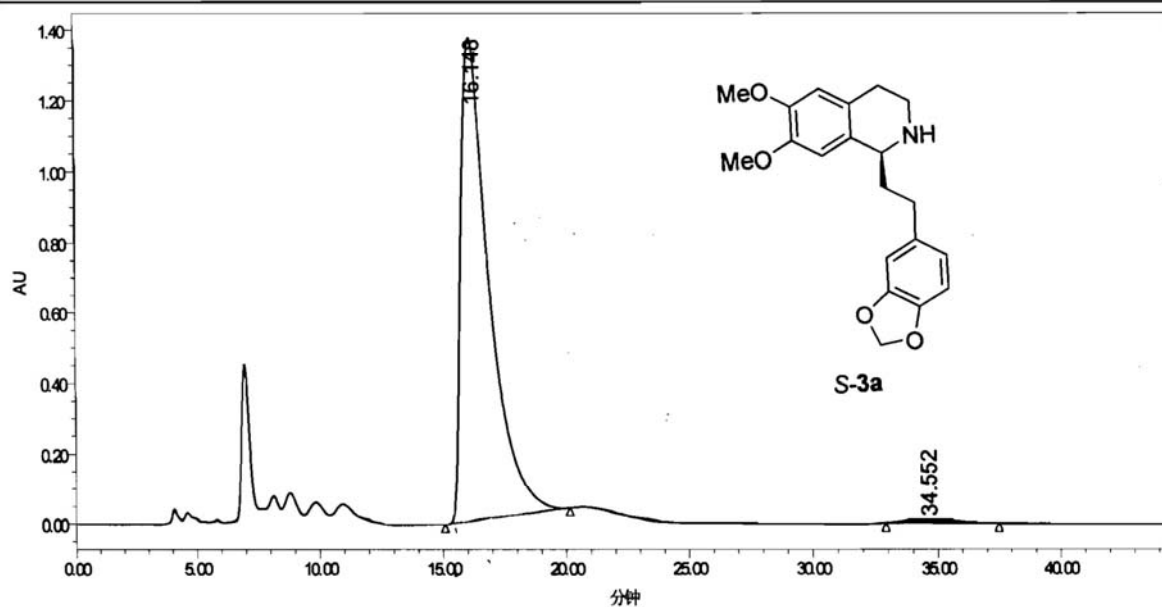

|   | RT<br>(min) | Area<br>(峰sec) | %Area | Height<br>(峰) | %<br>Height |
|---|-------------|----------------|-------|---------------|-------------|
| 1 | 16.148      | 109031594      | 98.82 | 1370045       | 99.37       |
| 2 | 34.552      | 1302977        | 1.18  | 8673          | 0.63        |

Report Method: 无标题

Page: 1 (共计 1)

Printed: 2014/1/10

16:25:04.FFC

**SAMPLE INFORMATION**

|                   |                           |                  |                        |
|-------------------|---------------------------|------------------|------------------------|
| Sample Name:      | W1-3-168-cd-h-60-40-1-214 | Acquired By:     | Breeze                 |
| Sample Type:      | 未知                        | Date Acquired:   | 2014/1/10 11:00:19 CST |
| Val:              | 1                         | Acq. Method:     | zj60                   |
| Injection #:      | 47                        | Date Processed:  | 2014/1/10 16:22:24 CST |
| Injection Volume: | 10.00 u                   | Channel Name:    | V2489 CHA              |
| Run Time:         | 60.00 Minutes             | Sample Set Name: |                        |

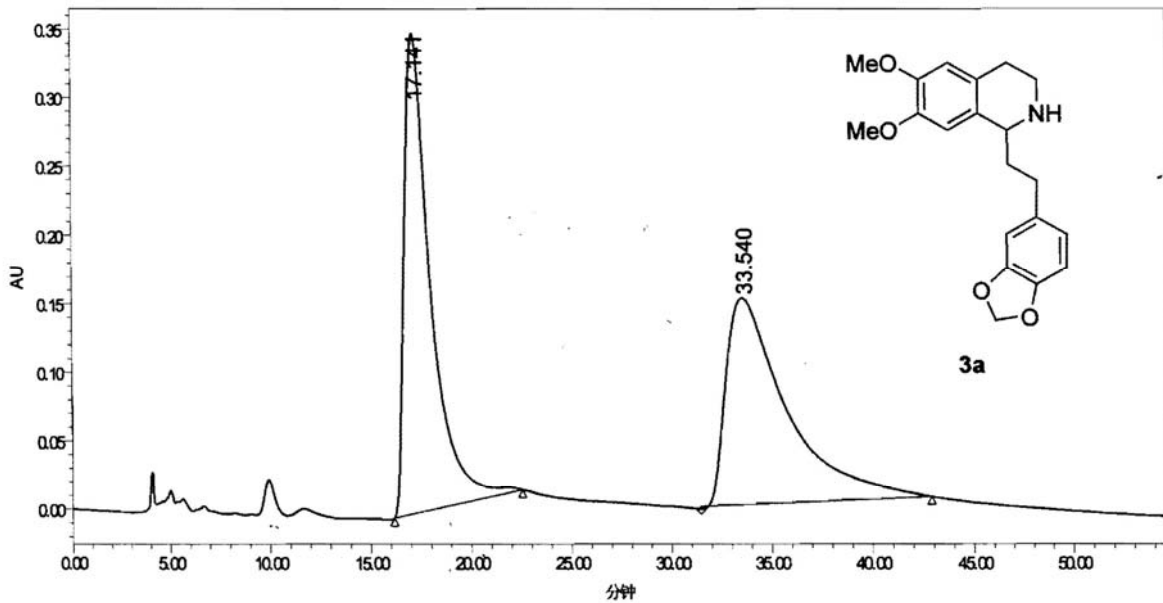

|   | RT (min) | Area (峰面积) | %Area | Height (峰高) | % Height |
|---|----------|------------|-------|-------------|----------|
| 1 | 17.141   | 31820424   | 50.03 | 360397      | 69.92    |
| 2 | 33.540   | 31779801   | 49.97 | 150750      | 30.08    |

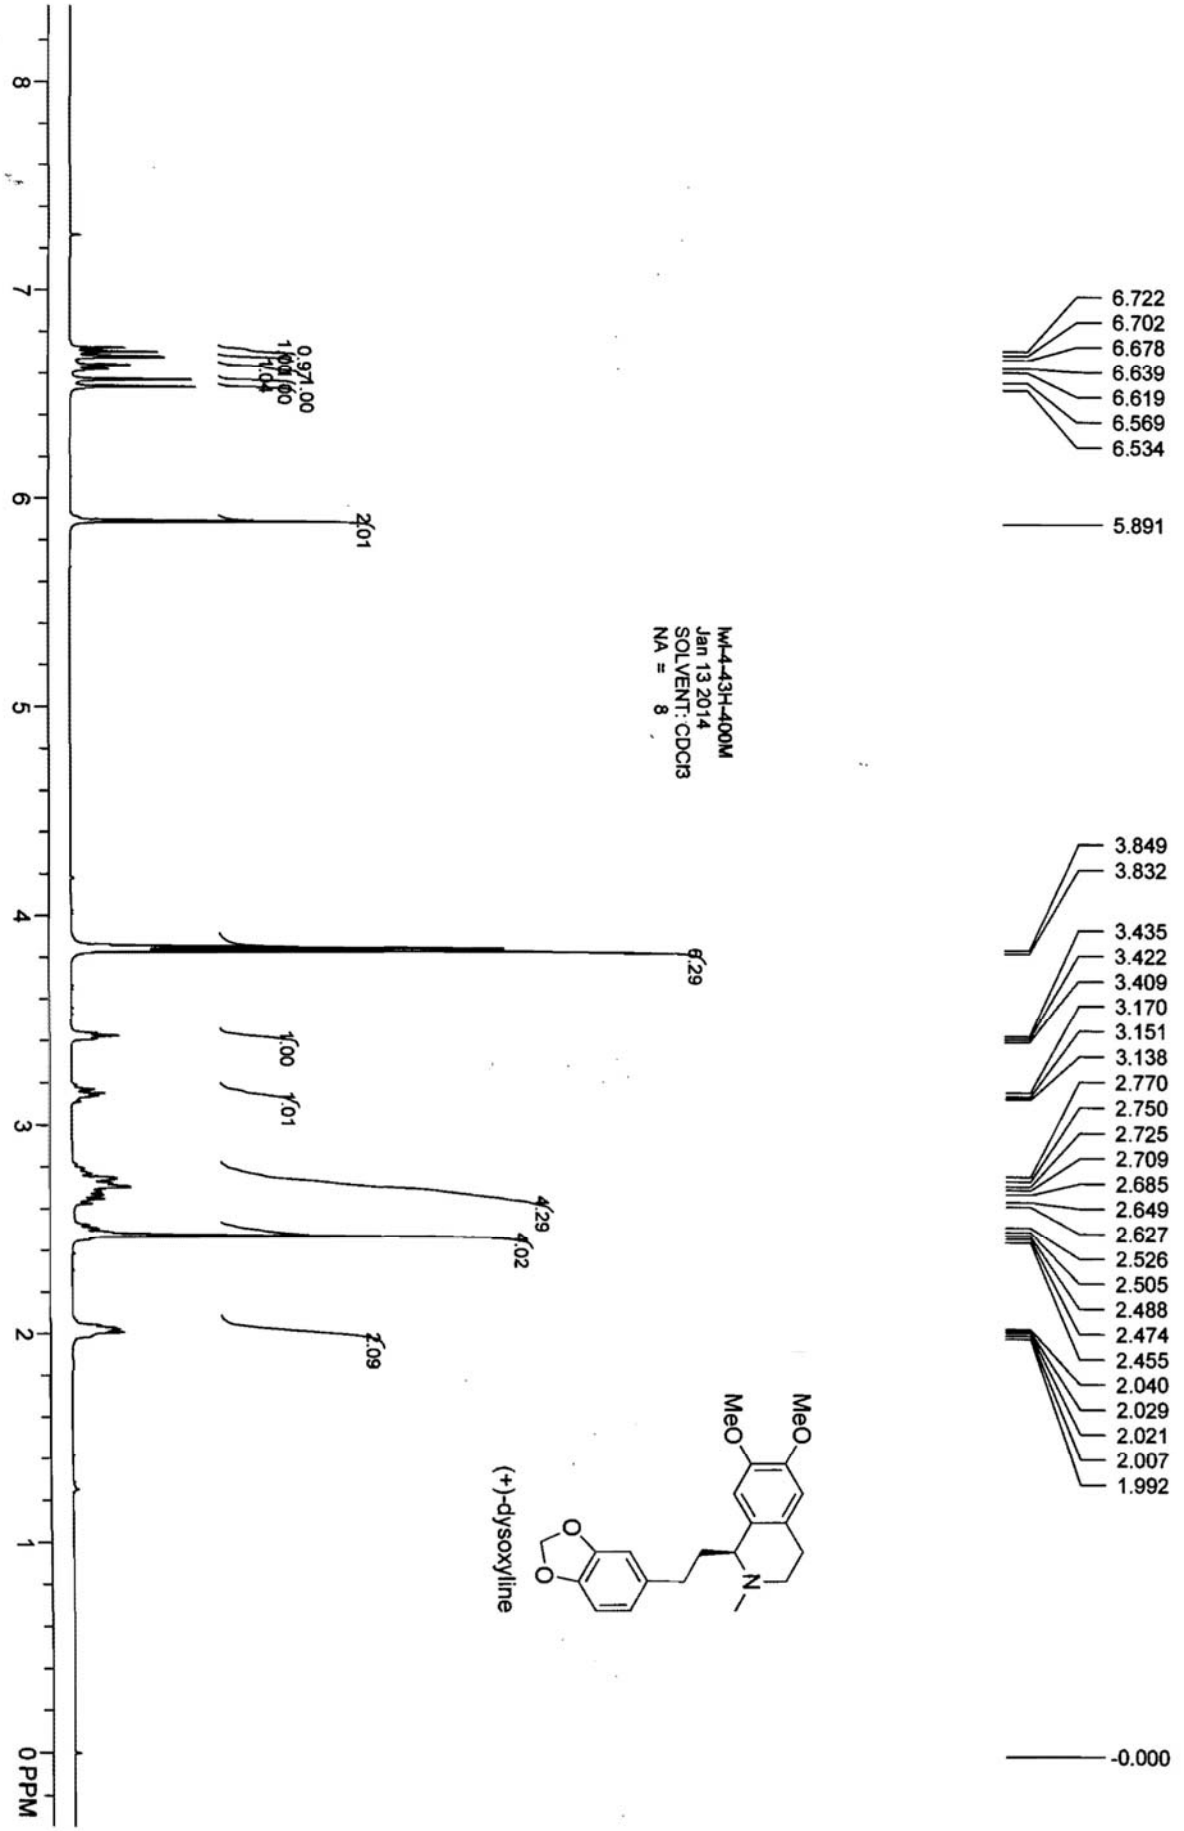

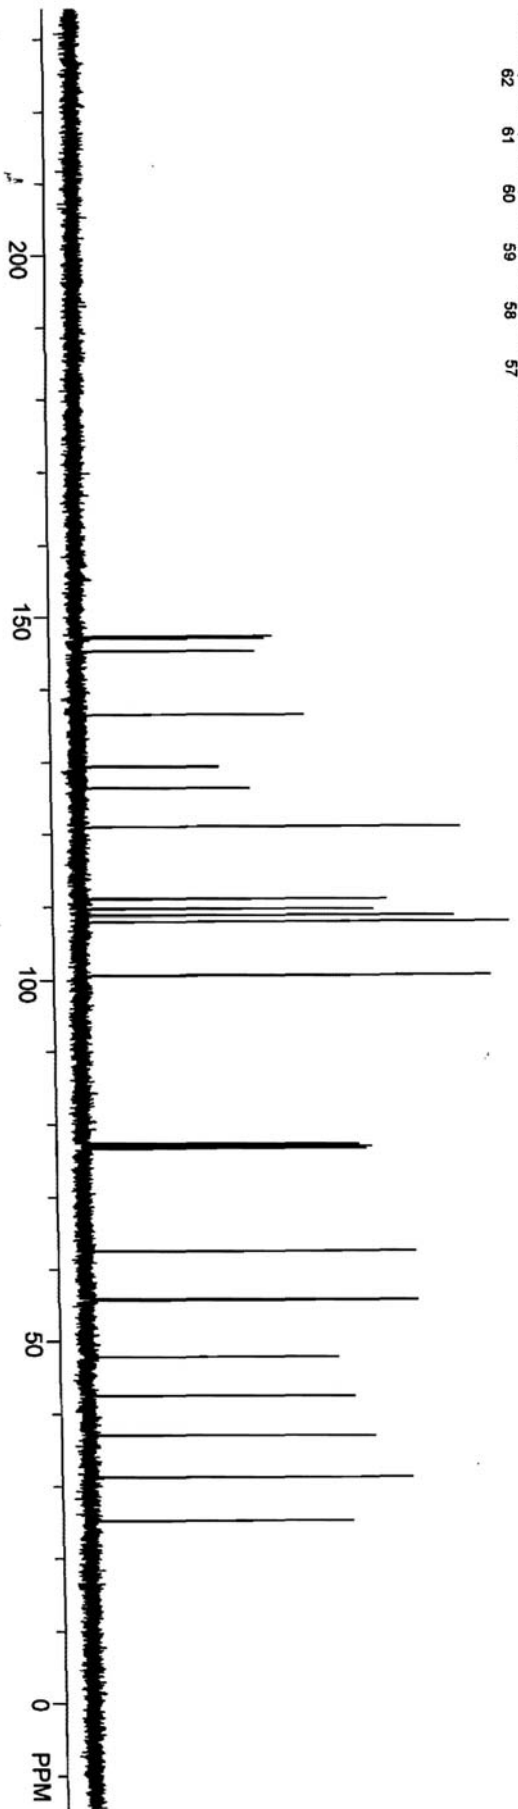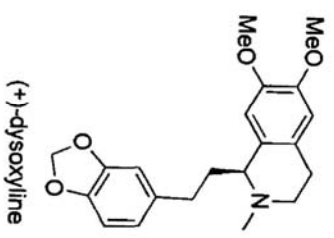

MW-4-43C-400M  
 Jan 13 2014  
 SOLVENT: cdcl3  
 NA = 80

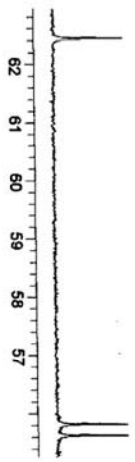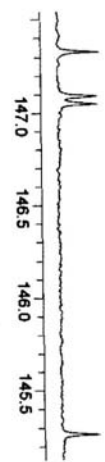

- 147.330
- 147.095
- 147.049
- 145.265
- 136.536
- 129.362
- 126.371
- 120.929
- 111.023
- 109.687
- 108.791
- 107.963
- 100.562
- 77.319
- 77.000
- 76.681
- 62.433
- 55.814
- 55.624
- 47.866
- 42.469
- 36.981
- 31.174
- 25.161

# lw1-4-43-if-80-20-0.5-214

实验时间: 2014-01-14, 13:35:31

报告时间: 2014-01-14, 15:08:05

谱图文件: D:\zhuguangjiong\lw1\20140113\lw1-4-43-if-80-20-0.5-214.org

实验内容简介:

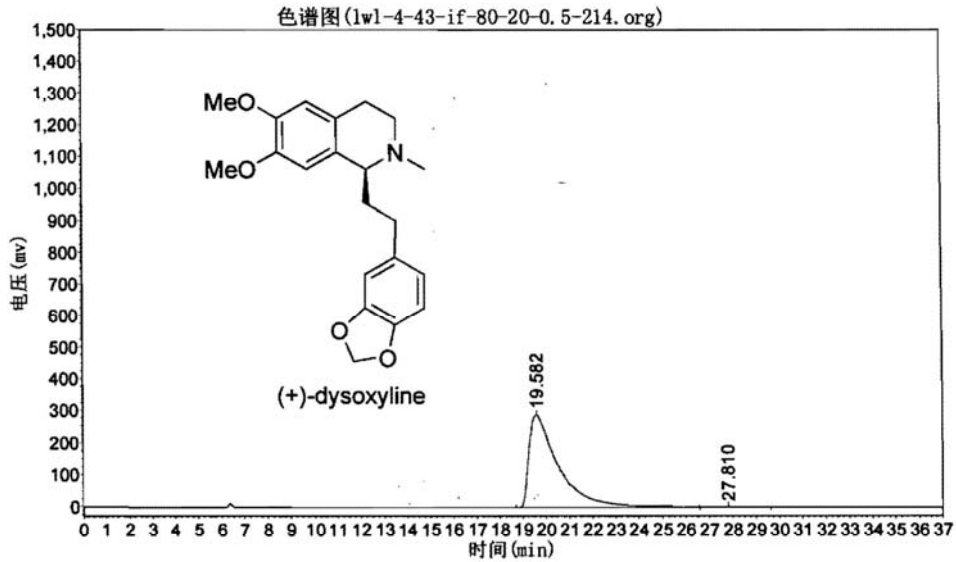

分析结果表

| 峰号 | 峰名 | 保留时间   | 峰高         | 峰面积          | 含量       |
|----|----|--------|------------|--------------|----------|
| 1  |    | 19.582 | 290361.156 | 25956498.000 | 98.7724  |
| 2  |    | 27.810 | 3050.142   | 322599.563   | 1.2276   |
| 总计 |    |        | 293411.299 | 26279097.563 | 100.0000 |

# lw1-3-156-if-80-20-0.5-214

实验时间: 2014-01-14, 14:17:31

报告时间: 2014-01-14, 15:09:06

谱图文件: D:\zhuguangji\lw1\20140113\lw1-3-156-if-80-20-0.5-214.org

实验内容简介:

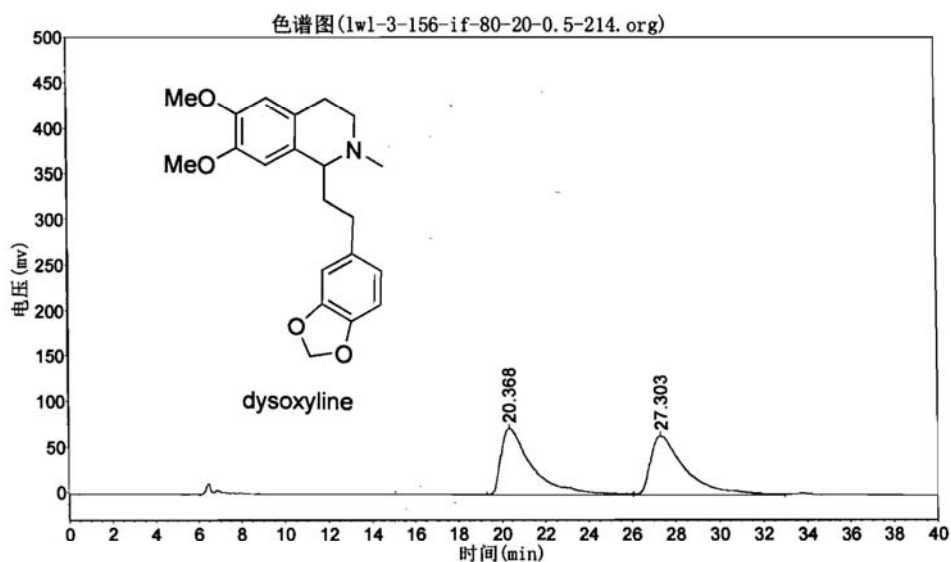

分析结果表

| 峰号 | 峰名 | 保留时间   | 峰高         | 峰面积          | 含量       |
|----|----|--------|------------|--------------|----------|
| 1  |    | 20.368 | 72201.688  | 7172550.500  | 50.4382  |
| 2  |    | 27.303 | 63927.234  | 7047931.000  | 49.5618  |
| 总计 |    |        | 136128.922 | 14220481.500 | 100.0000 |

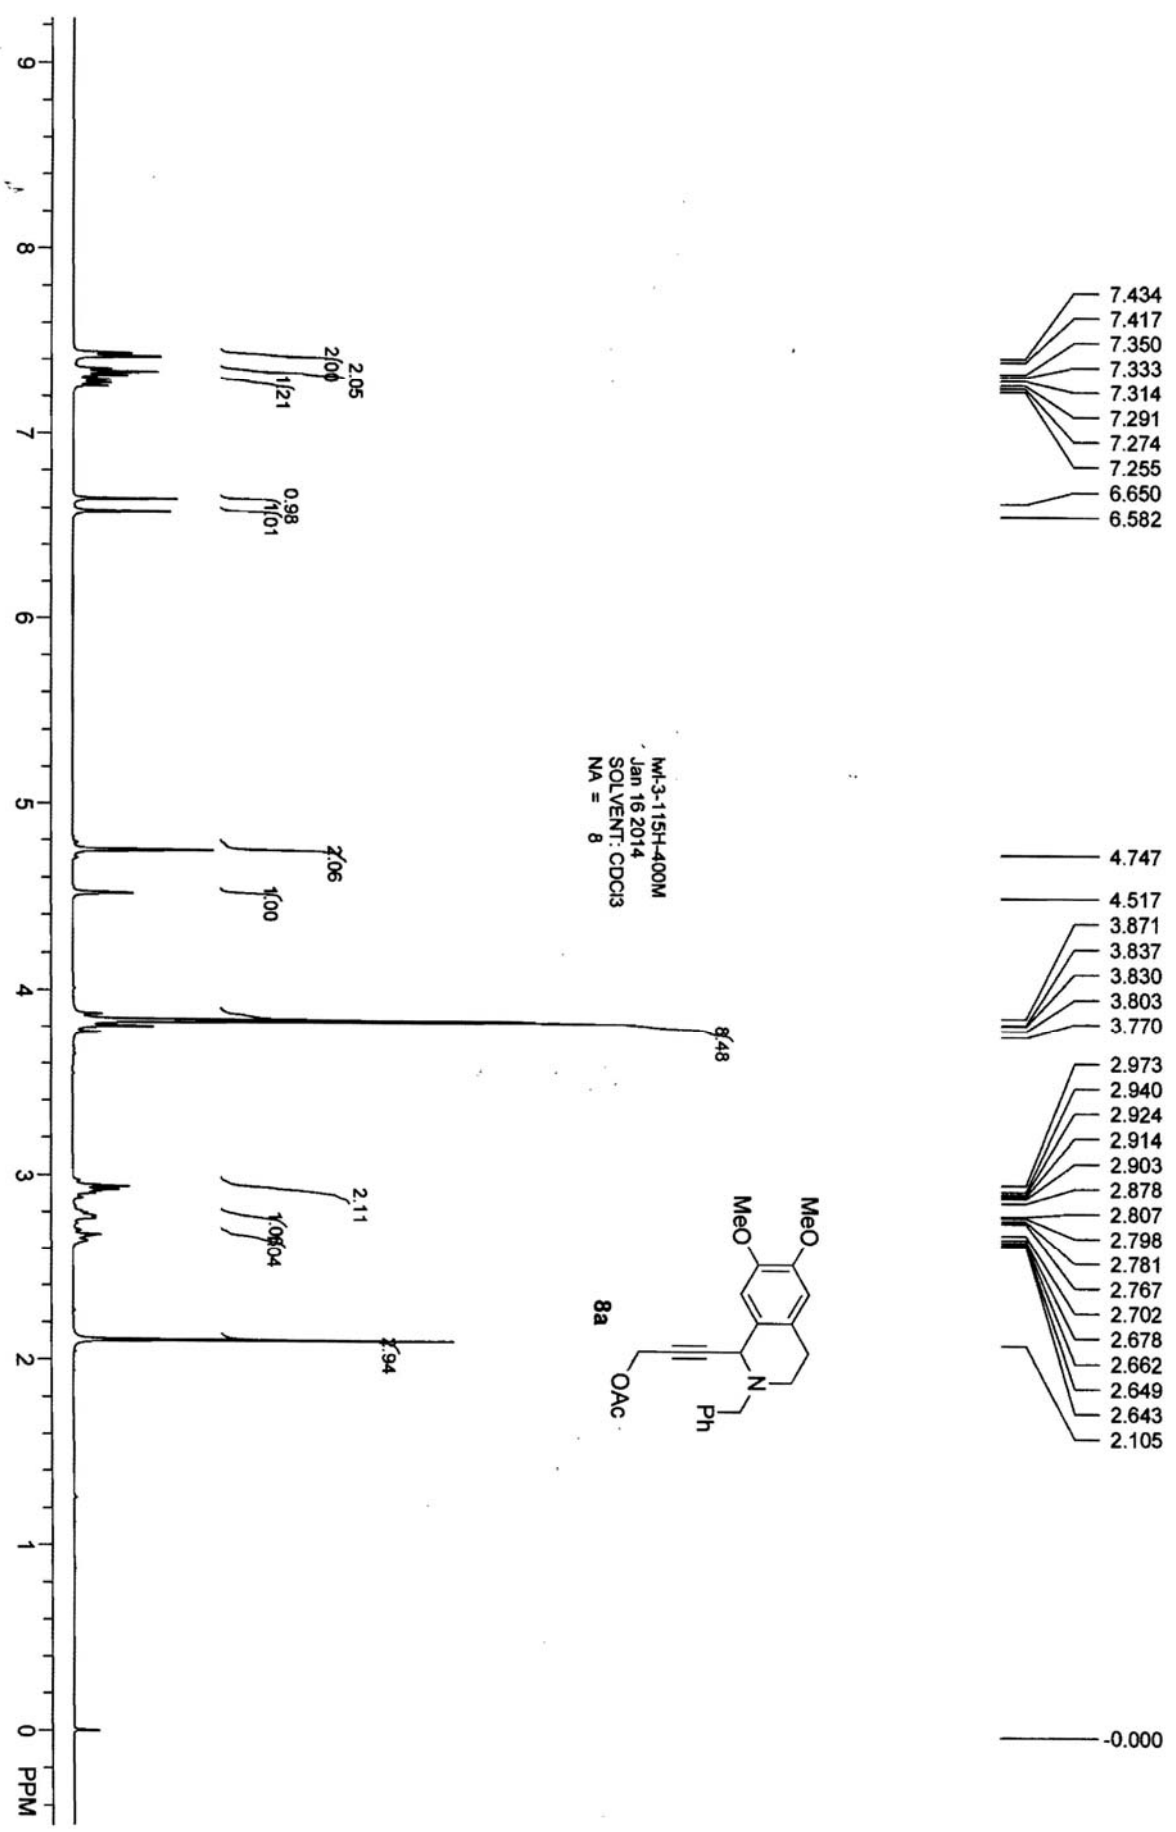

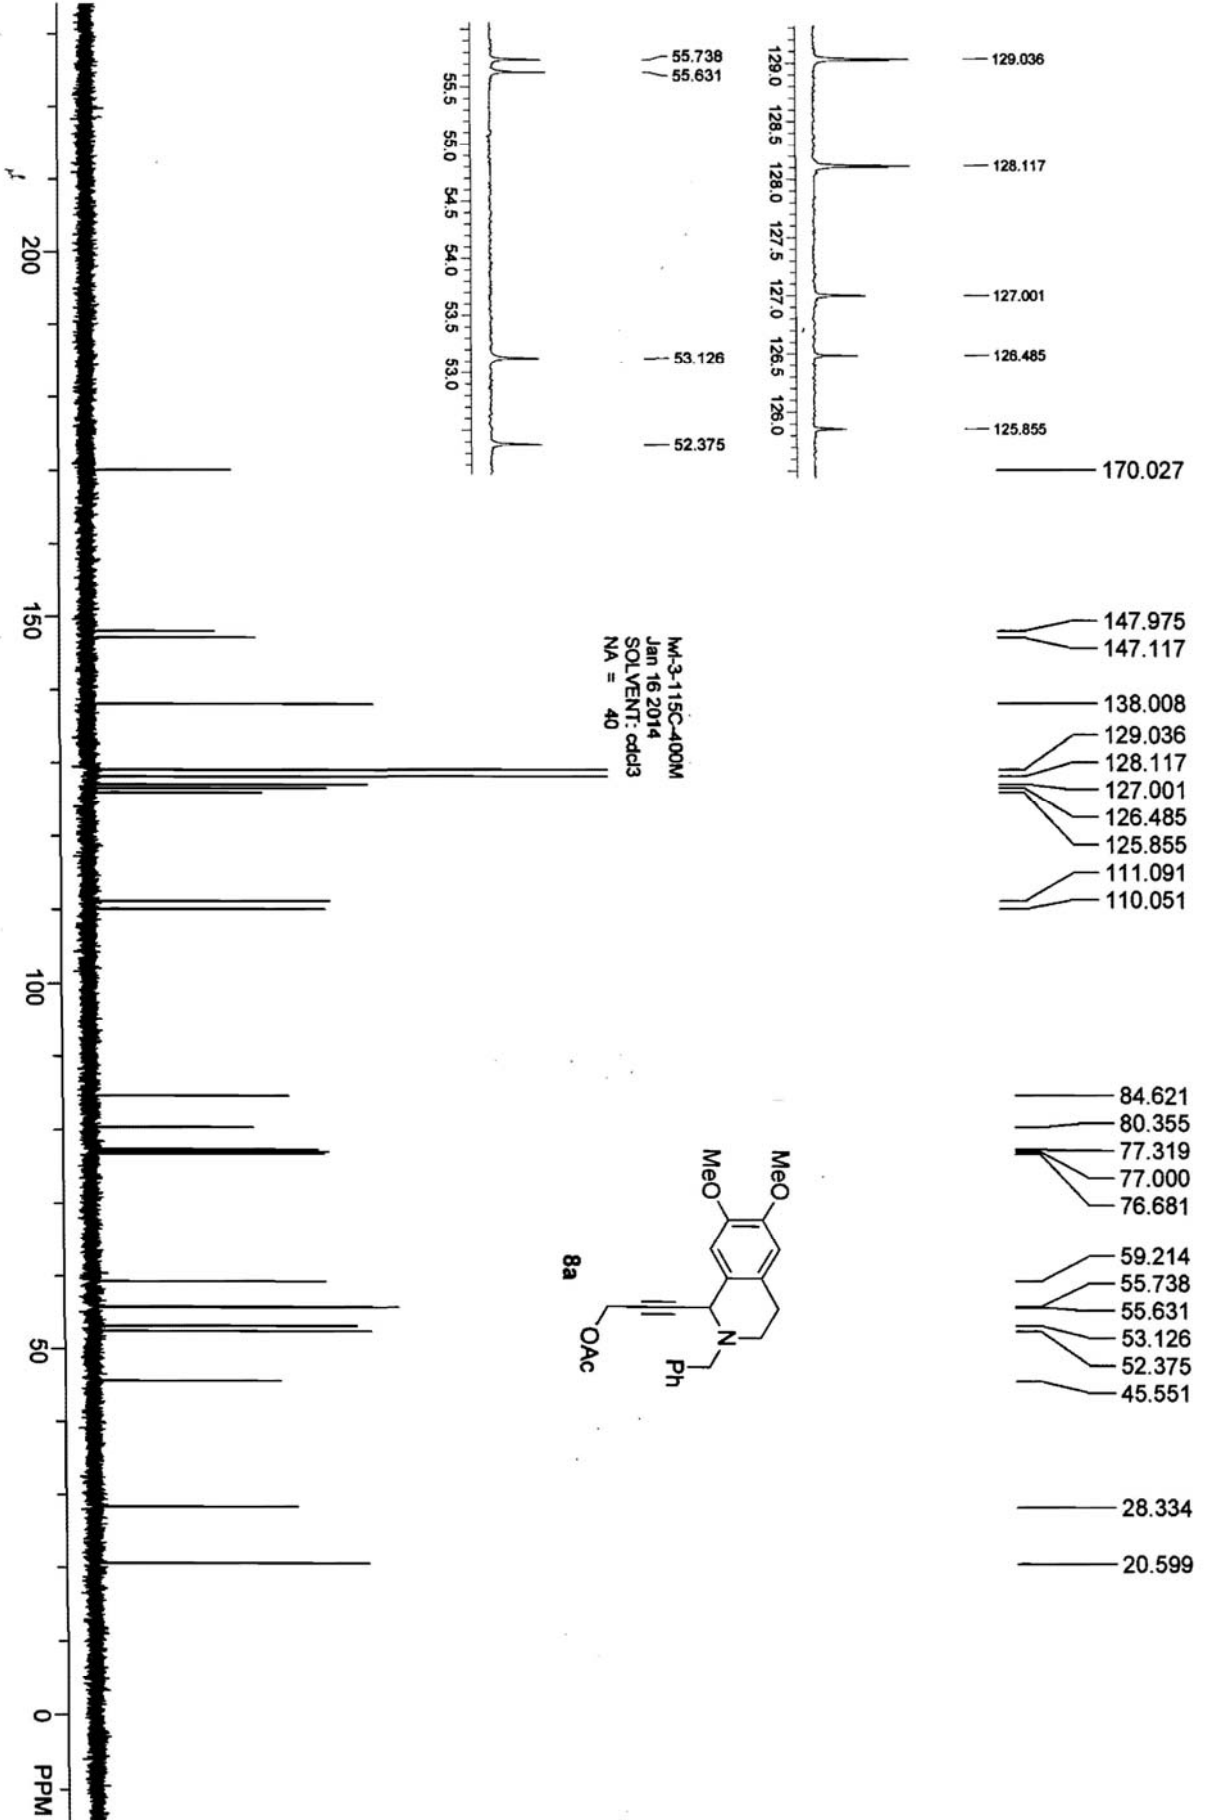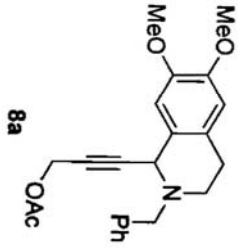



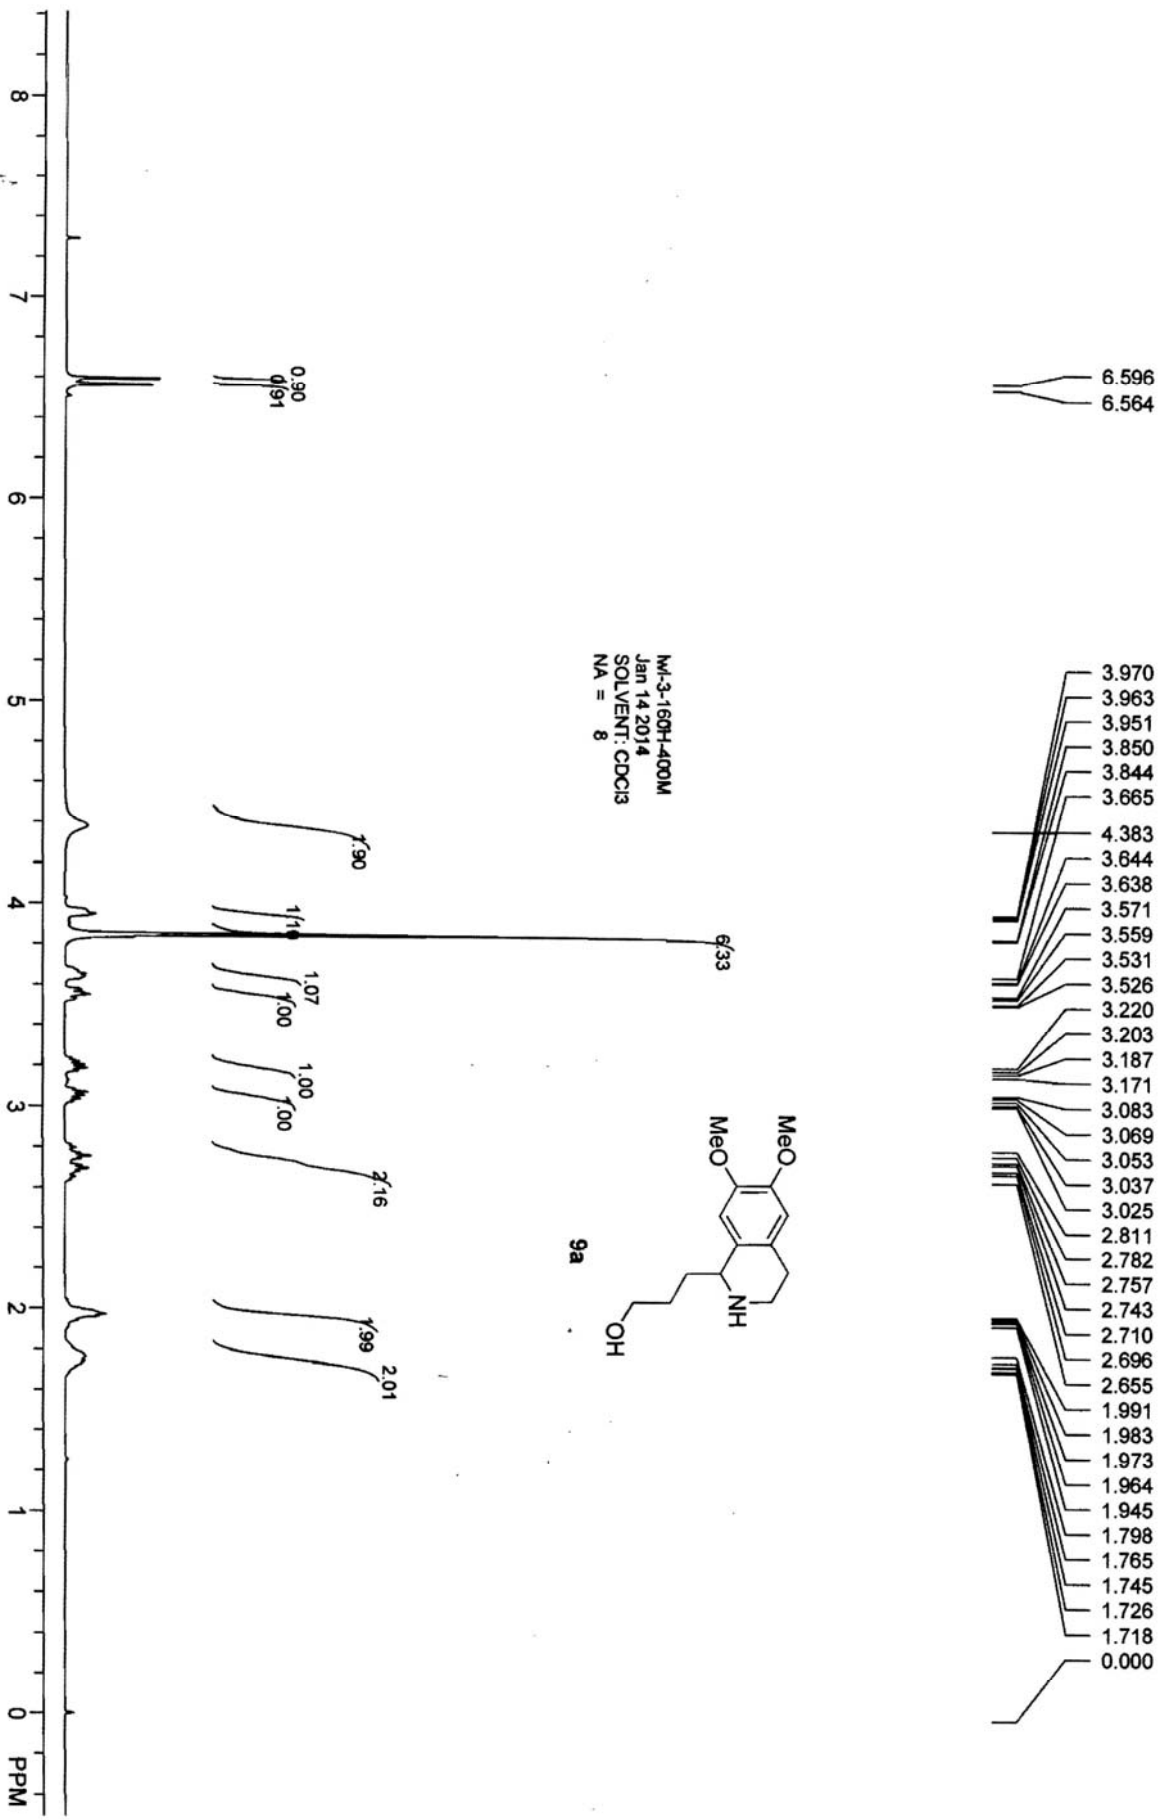

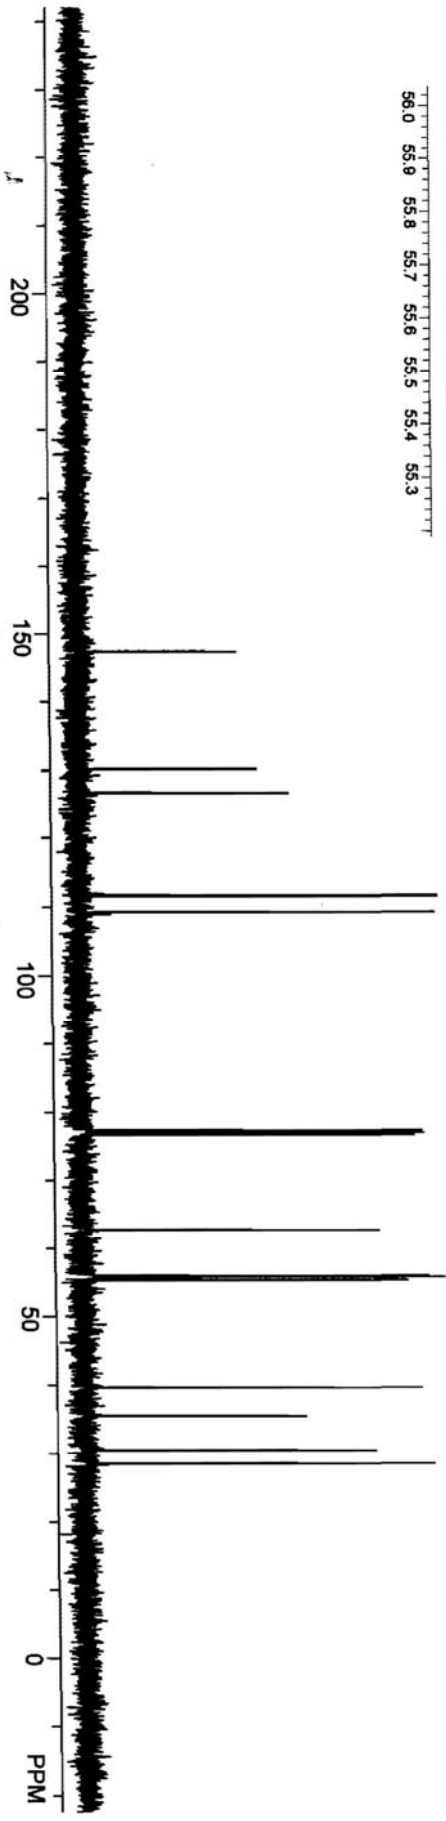

56.0 55.8 55.8 55.7 55.6 55.5 55.4 55.3

147.6 147.5 147.4 147.3 147.2 147.1  
 55.899 55.710 55.294

147.387  
 147.270

147.387  
 147.270

130.103  
 126.508

111.524  
 109.212

77.319  
 77.000  
 76.681

62.685  
 55.899  
 55.710  
 55.294

39.596  
 35.440  
 30.474  
 28.541

Mt-3-160C-400M  
 Jan 14 2014  
 SOLVENT: cdcl3  
 NA = 64

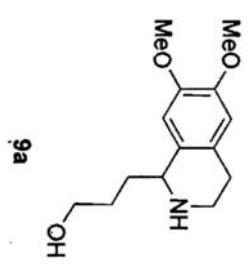

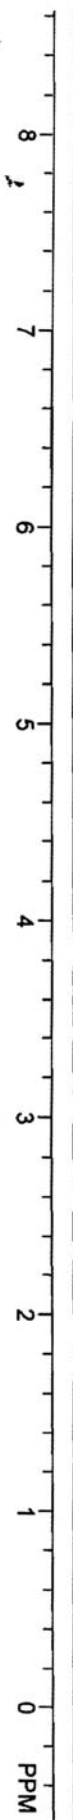

MW-3-163H-400M.  
 Jan 15 2014  
 SOLVENT: CDCl3  
 NA = 8

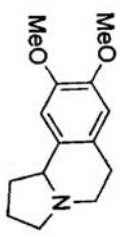

0.98  
 0.91  
 6.26  
 2.06  
 2.06  
 2.17  
 1.05  
 1.05  
 0.98  
 1.09

6.611  
6.569

3.850  
 3.845  
 3.451  
 3.431  
 3.411  
 3.207  
 3.192  
 3.180  
 3.157  
 3.106  
 3.084  
 3.063  
 3.024  
 2.983  
 2.757  
 2.749  
 2.726  
 2.716  
 2.709  
 2.667  
 2.653  
 2.602  
 2.580  
 2.560  
 2.359  
 2.338  
 2.307  
 2.298  
 1.948  
 1.931  
 1.912  
 1.884  
 1.875  
 1.853  
 1.773  
 1.745  
 1.721  
 1.693  
 -0.000

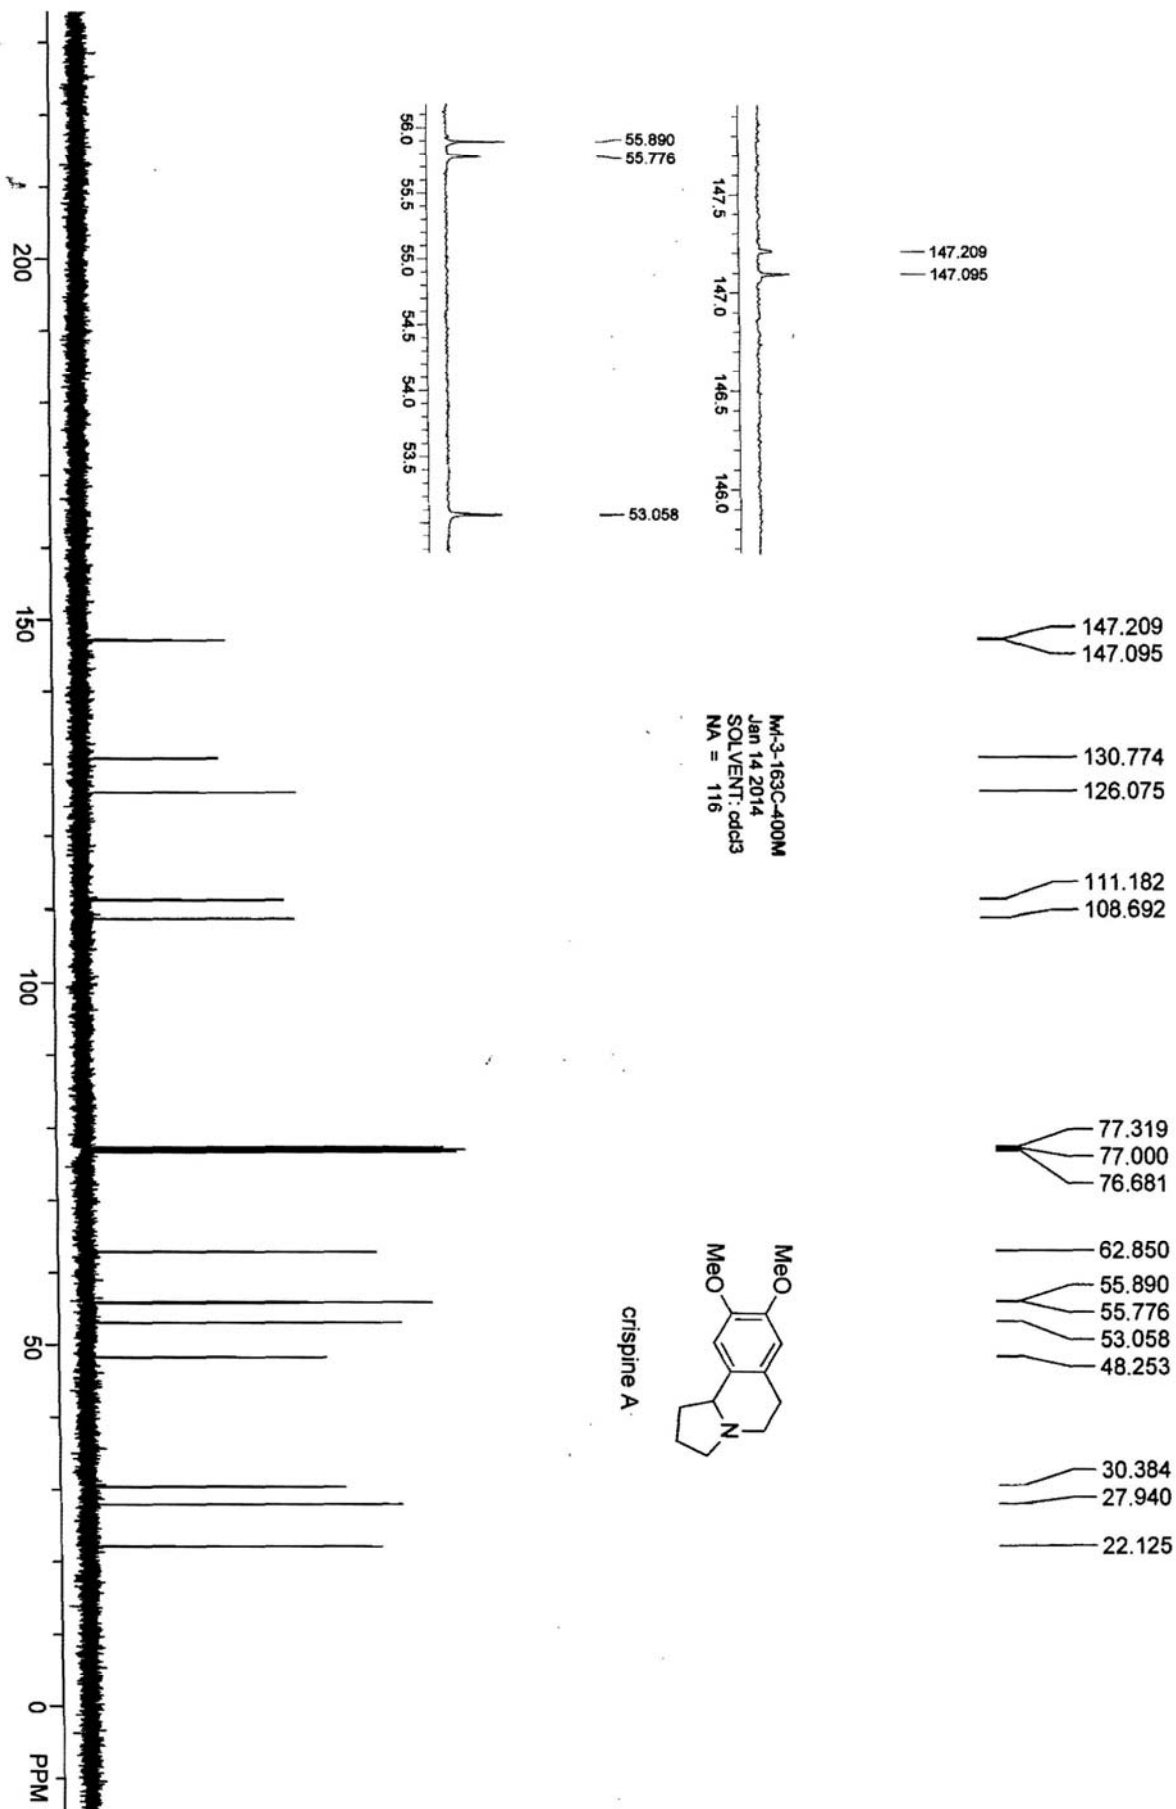

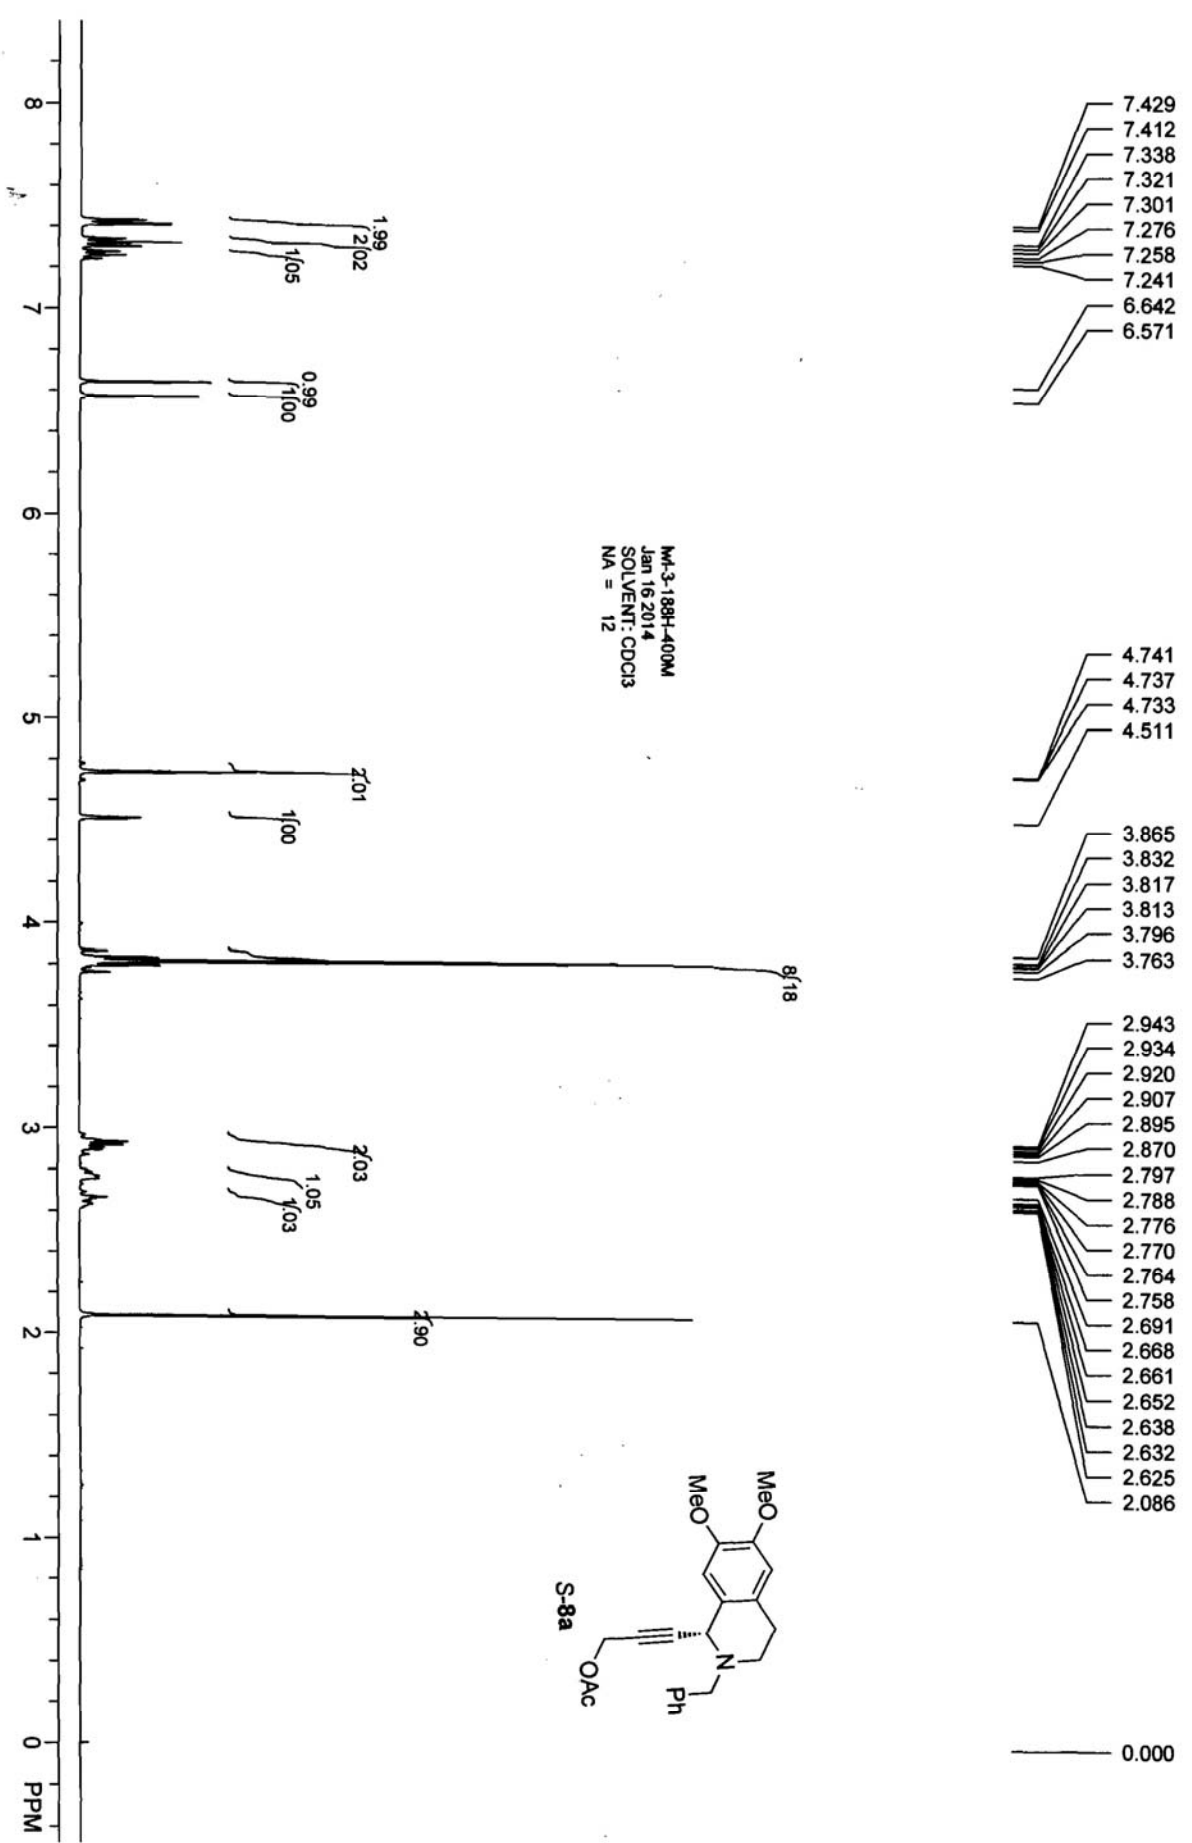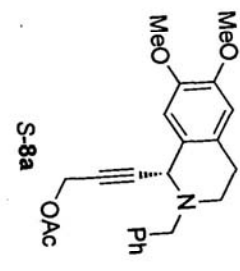

M4-3-189H-400M  
 Jan 16 2014  
 SOLVENT: CDCl3  
 NA = 12

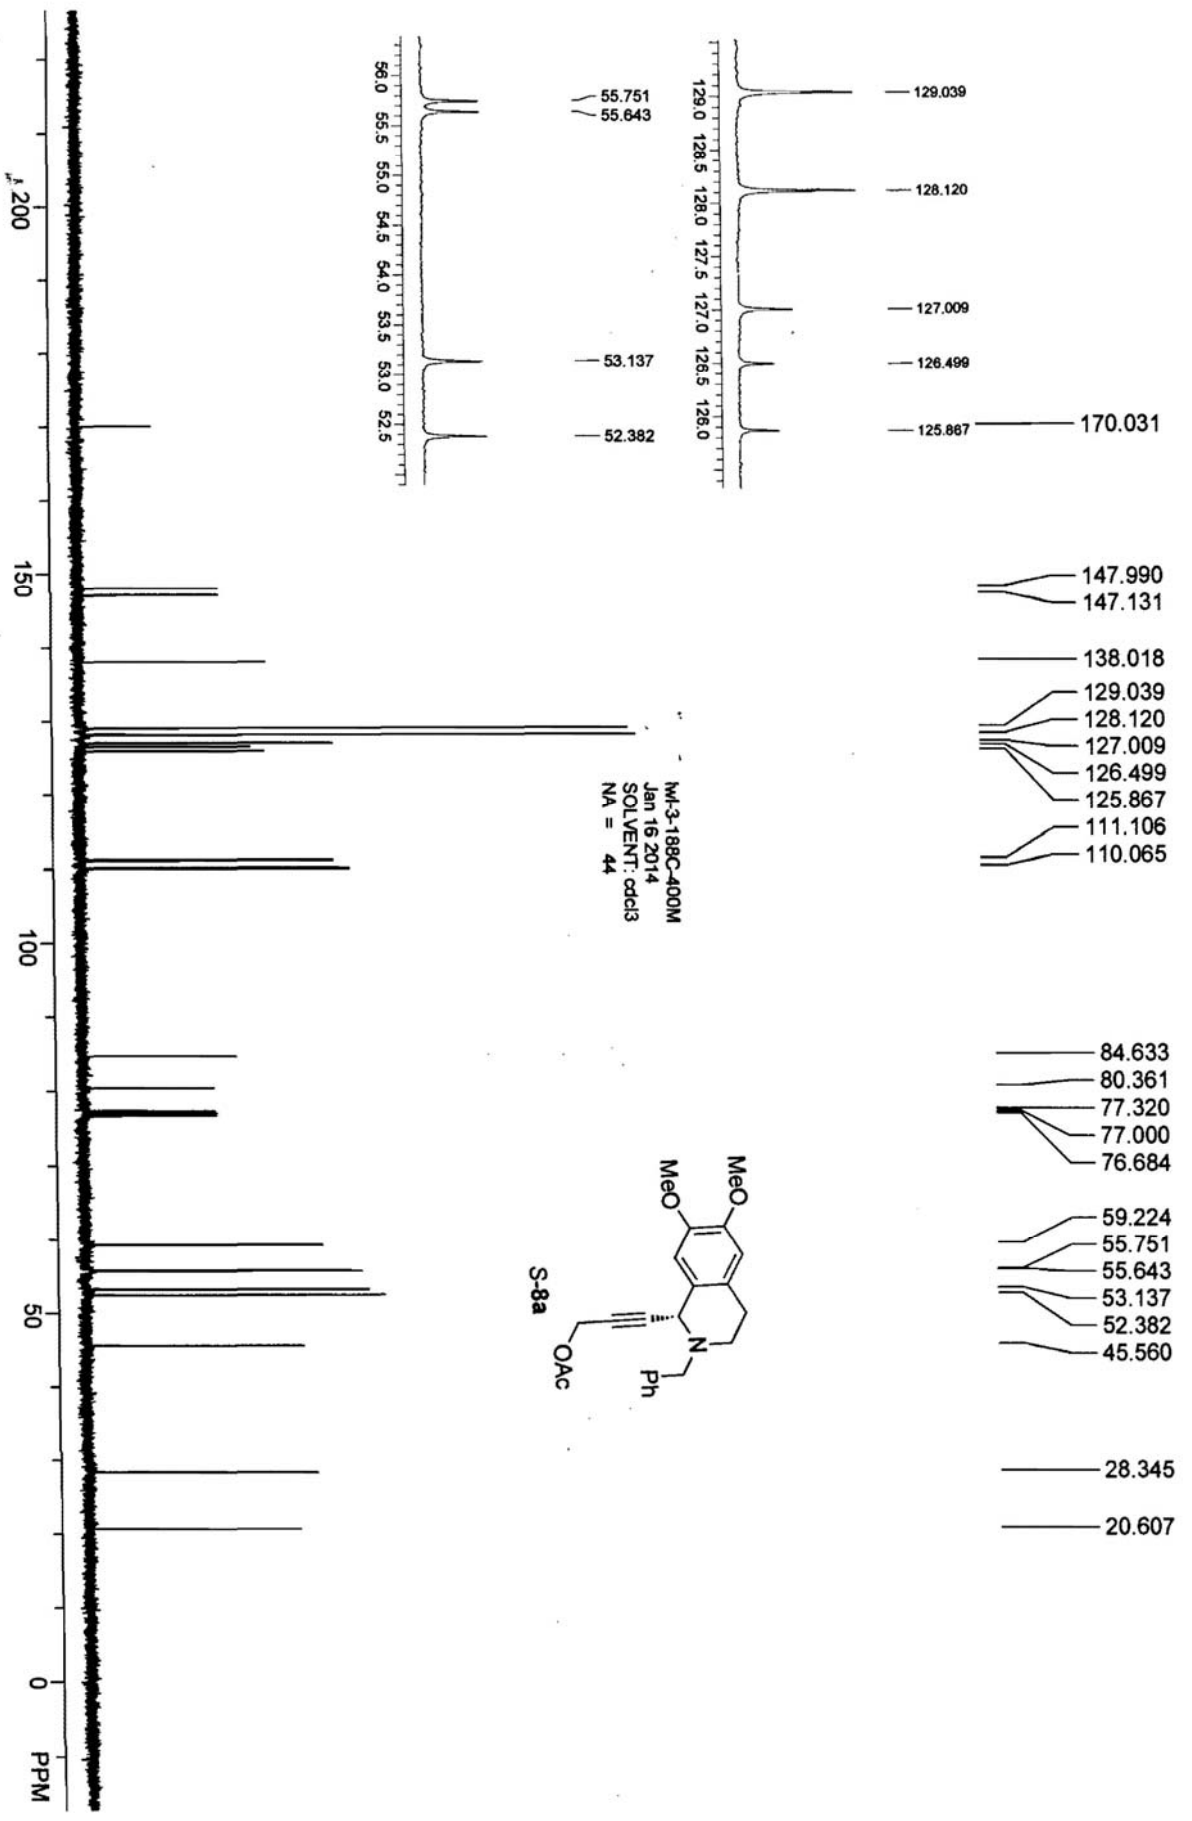

**SAMPLE INFORMATION**

|                   |                           |                  |                        |
|-------------------|---------------------------|------------------|------------------------|
| Sample Name:      | MW-3-188-ad-h-85-15-1-214 | Acquired By:     | Breeze                 |
| Sample Type:      | 未知                        | Date Acquired:   | 2013/12/9 16:38:17 CST |
| Val:              | 1                         | Acq. Method:     | zqj85                  |
| Injection #:      | 10                        | Date Processed:  | 2013/12/9 16:57:51 CST |
| Injection Volume: | 10.00 uL                  | Channel Name:    | V2489 CHA              |
| Run Time:         | 40.00 Minutes             | Sample Set Name: |                        |

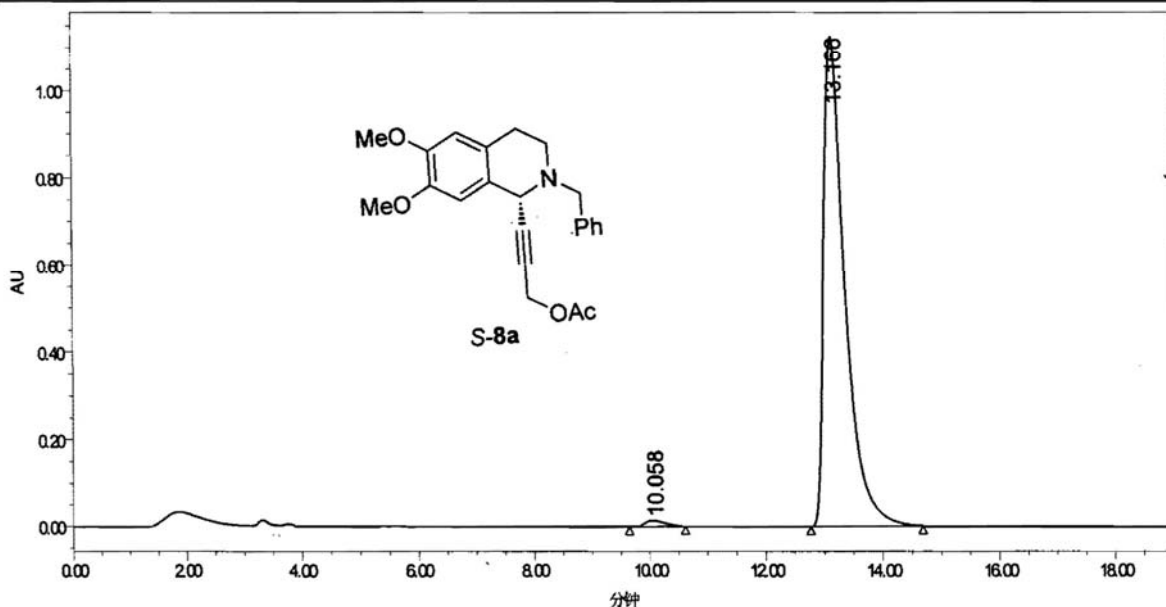

|   | RT (min) | Area (峰面积) | %Area | Height (峰高) | % Height |
|---|----------|------------|-------|-------------|----------|
| 1 | 10.058   | 336896     | 1.17  | 13636       | 1.21     |
| 2 | 13.166   | 28425840   | 98.83 | 1125114     | 98.79    |

**SAMPLE INFORMATION**

|                   |                          |                  |                        |
|-------------------|--------------------------|------------------|------------------------|
| Sample Name:      | lw-3-161-adh-85-15-1-214 | Acquired By:     | Breeze                 |
| Sample Type:      | 未知                       | Date Acquired:   | 2013/12/9 15:49:02 CST |
| Vial:             | 1                        | Acq. Method:     | zg85                   |
| Injection #:      | 8                        | Date Processed:  | 2013/12/9 16:20:39 CST |
| Injection Volume: | 10.00 ul                 | Channel Name:    | V2489 ChA              |
| Run Time:         | 40.00 Minutes            | Sample Set Name: |                        |

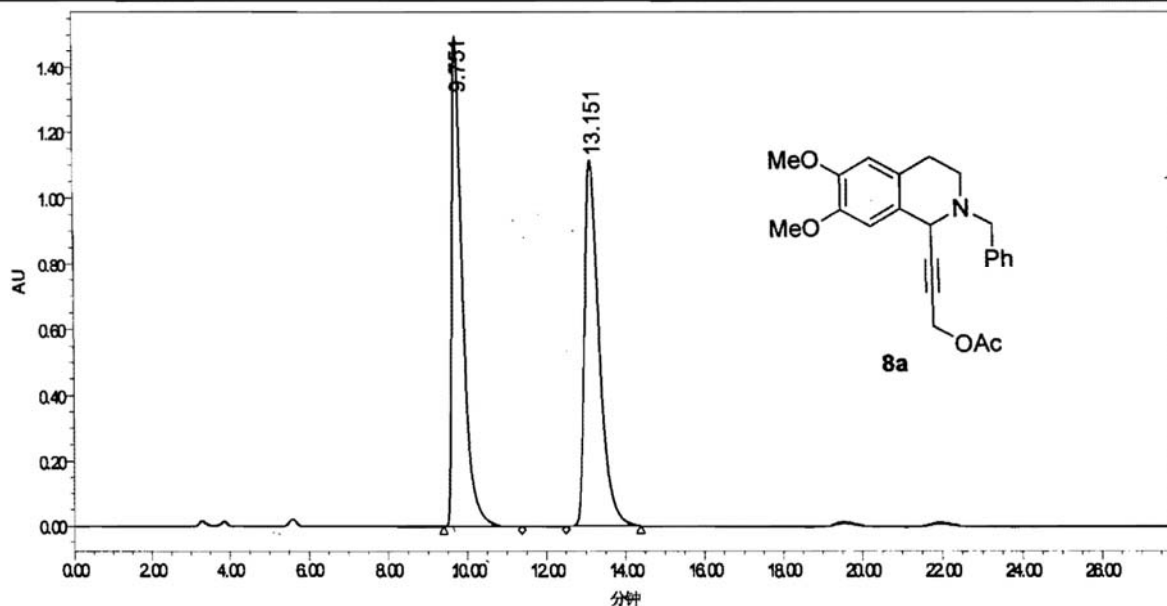

|   | RT (min) | Area (峰面积) | %Area | Height (峰高) | % Height |
|---|----------|------------|-------|-------------|----------|
| 1 | 9.751    | 27840116   | 49.50 | 1497470     | 57.33    |
| 2 | 13.151   | 28399882   | 50.50 | 1114660     | 42.67    |



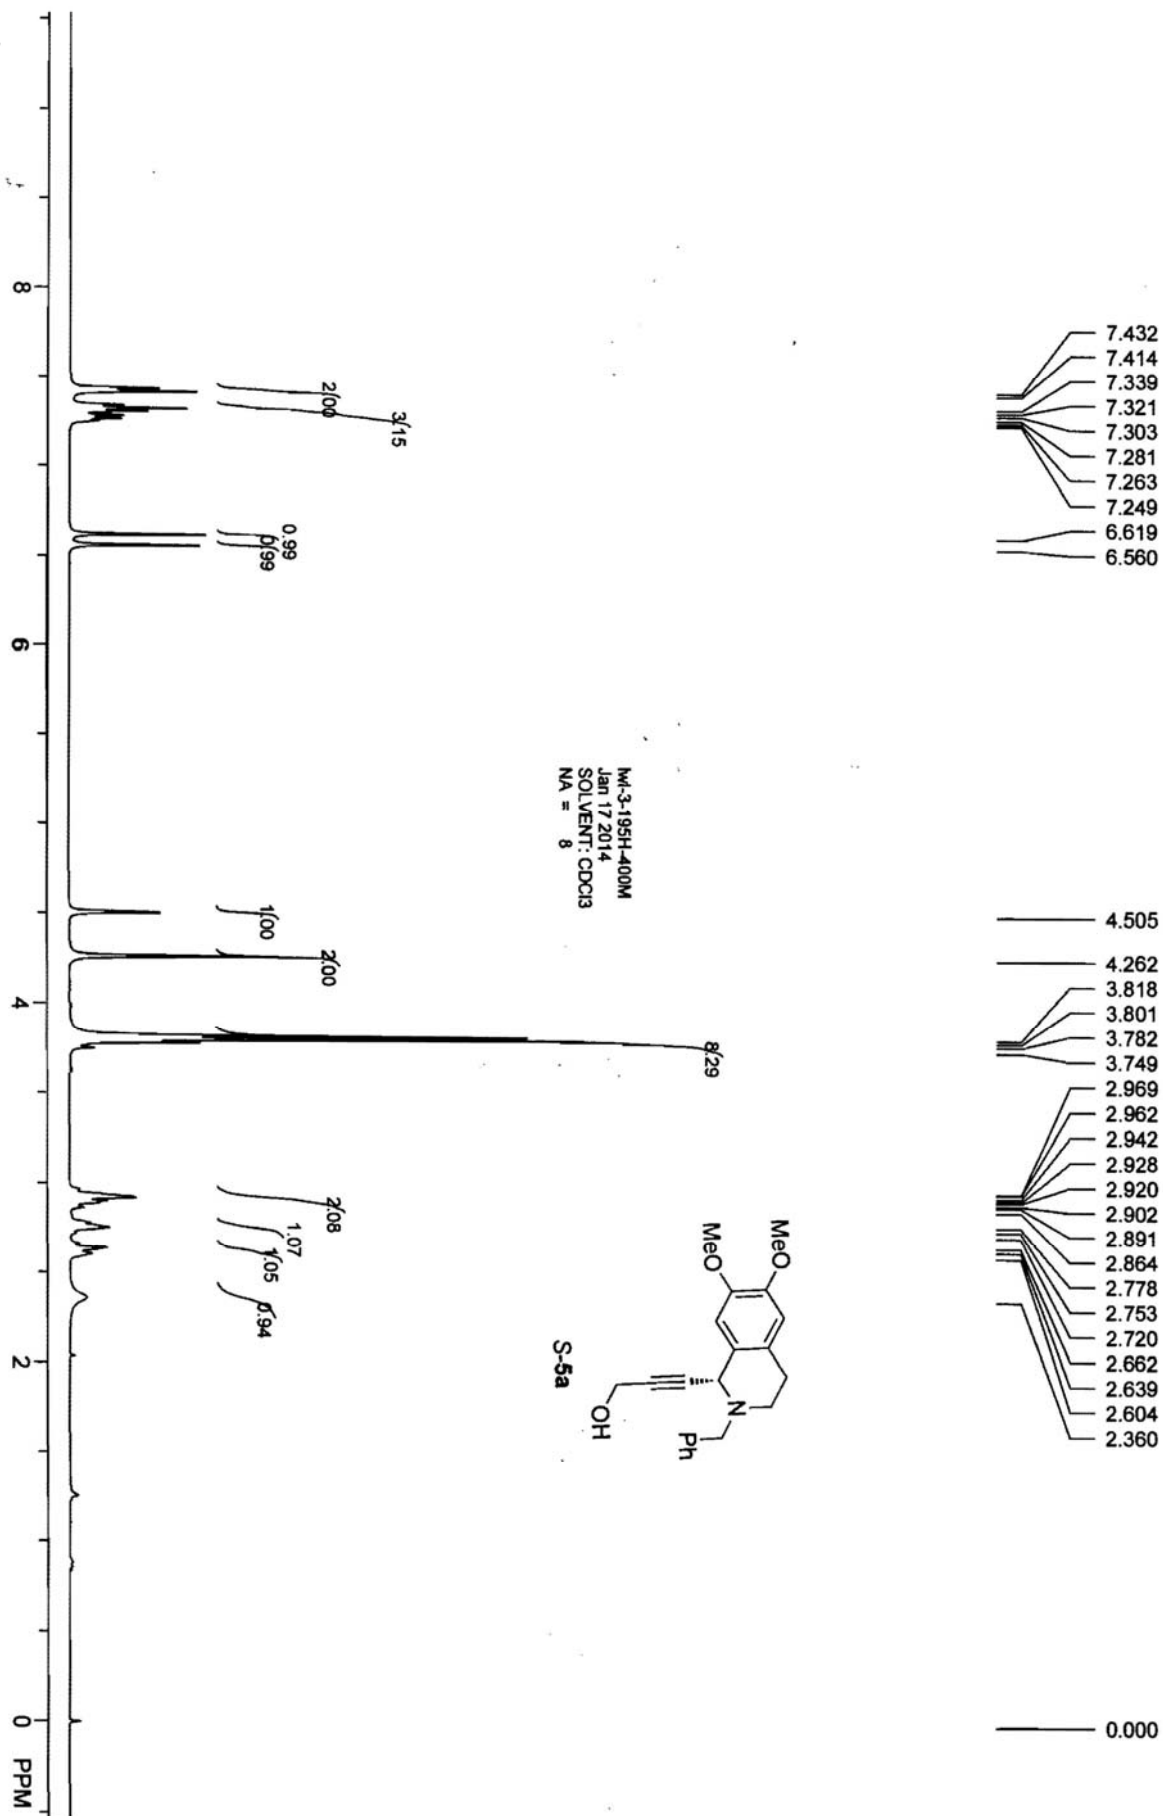

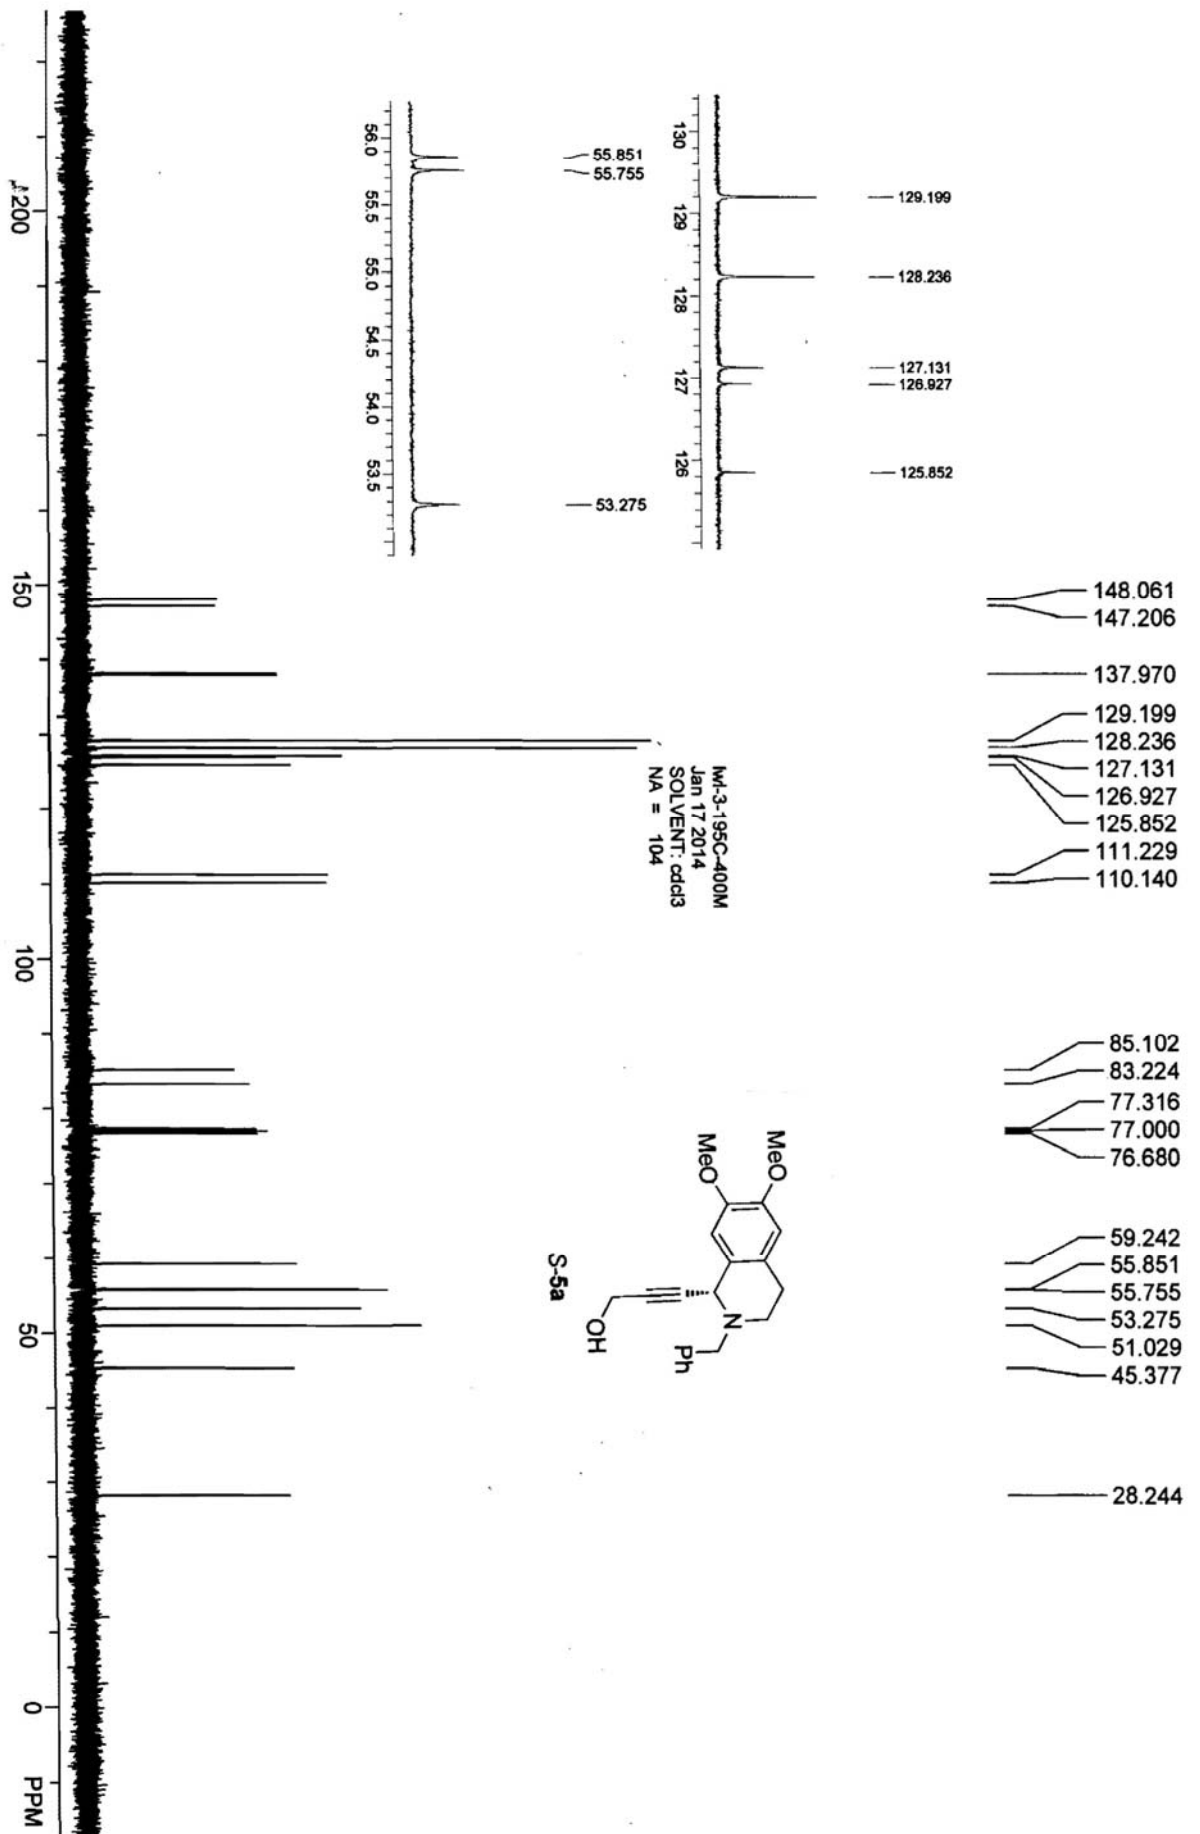

# 1w1-3-195-od-h-95-5-0.4-214

实验时间: 2014-01-17, 13:54:58

报告时间: 2014-01-17, 15:17:14

谱图文件: D:\zhuguangjiong\lwl\20140117\1w1-3-195-od-h-95-5-0.4-214.org

实验内容简介:

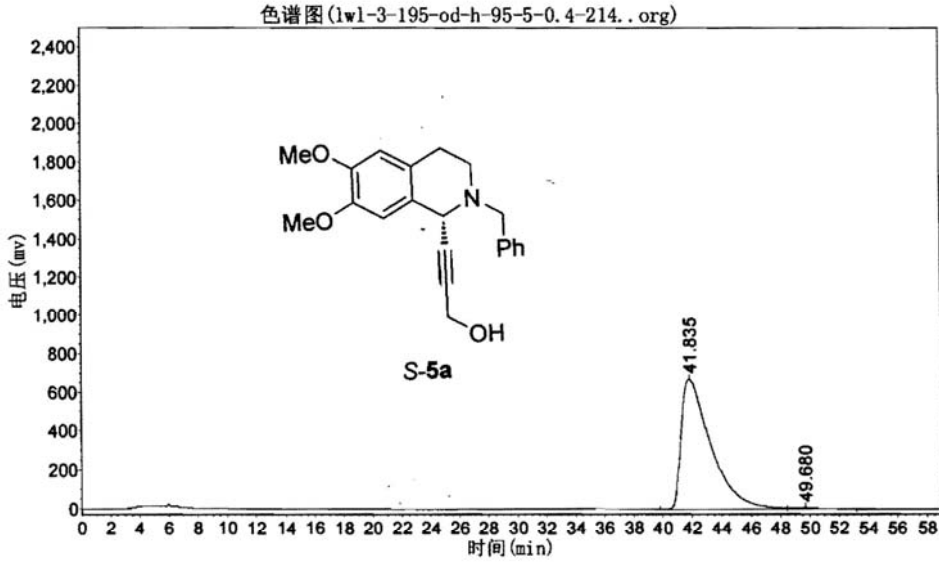

分析结果表

| 峰号 | 峰名 | 保留时间   | 峰高         | 峰面积          | 含量       |
|----|----|--------|------------|--------------|----------|
| 1  |    | 41.835 | 670775.000 | 94157256.000 | 98.8589  |
| 2  |    | 49.680 | 7047.879   | 1086818.625  | 1.1411   |
| 总计 |    |        | 677822.879 | 95244074.625 | 100.0000 |

# lw1-3-166-od-h-95-5-0.4-214

实验时间: 2014-01-17, 11:42:57

报告时间: 2014-01-17, 15:15:37

谱图文件: D:\zhuguangjiong\lw1\20140117\lw1-3-166-od-h-95-5-0.4-214.org

实验内容简介:

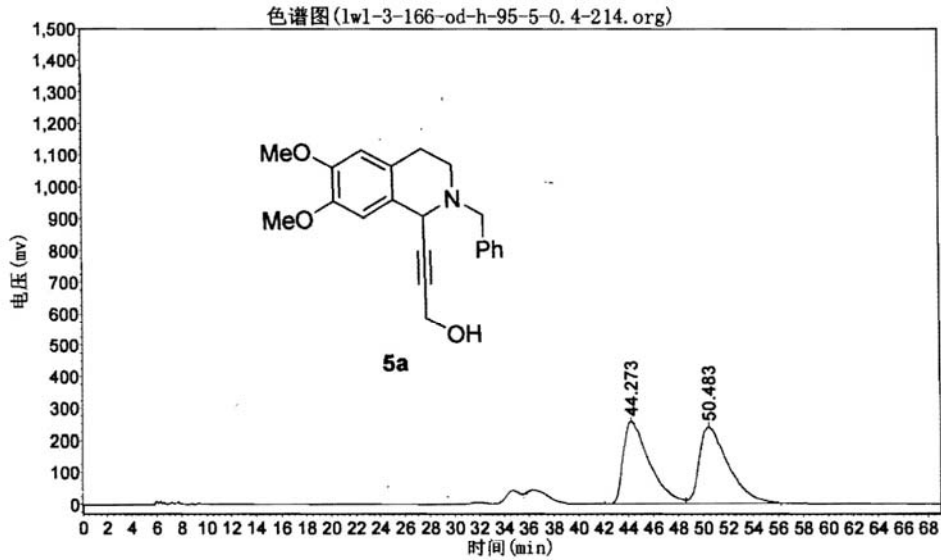

分析结果表

| 峰号 | 峰名 | 保留时间   | 峰高         | 峰面积          | 含量       |
|----|----|--------|------------|--------------|----------|
| 1  |    | 44.273 | 256186.859 | 37735828.000 | 49.6446  |
| 2  |    | 50.483 | 237579.047 | 38276112.000 | 50.3554  |
| 总计 |    |        | 493765.906 | 76011940.000 | 100.0000 |

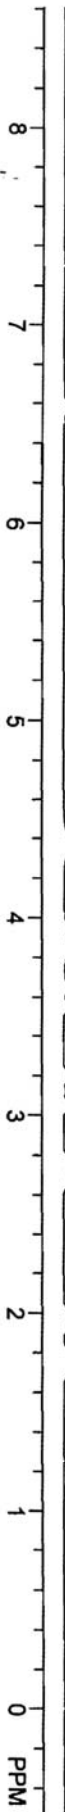

HW-4-34H-400M  
 Jan 16 2014  
 SOLVENT: CDCl3  
 NA = 12

R-9a

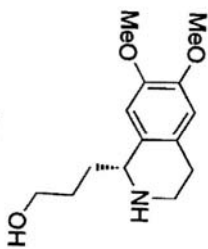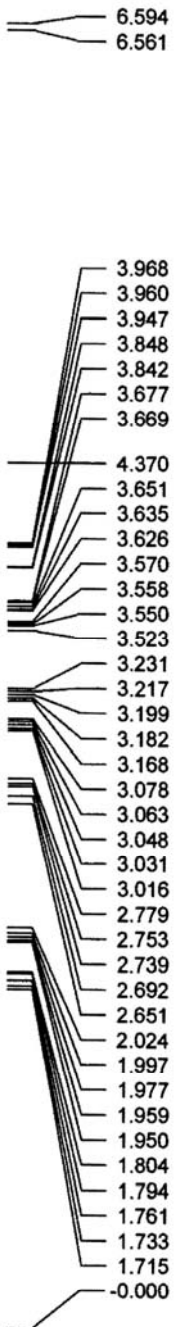

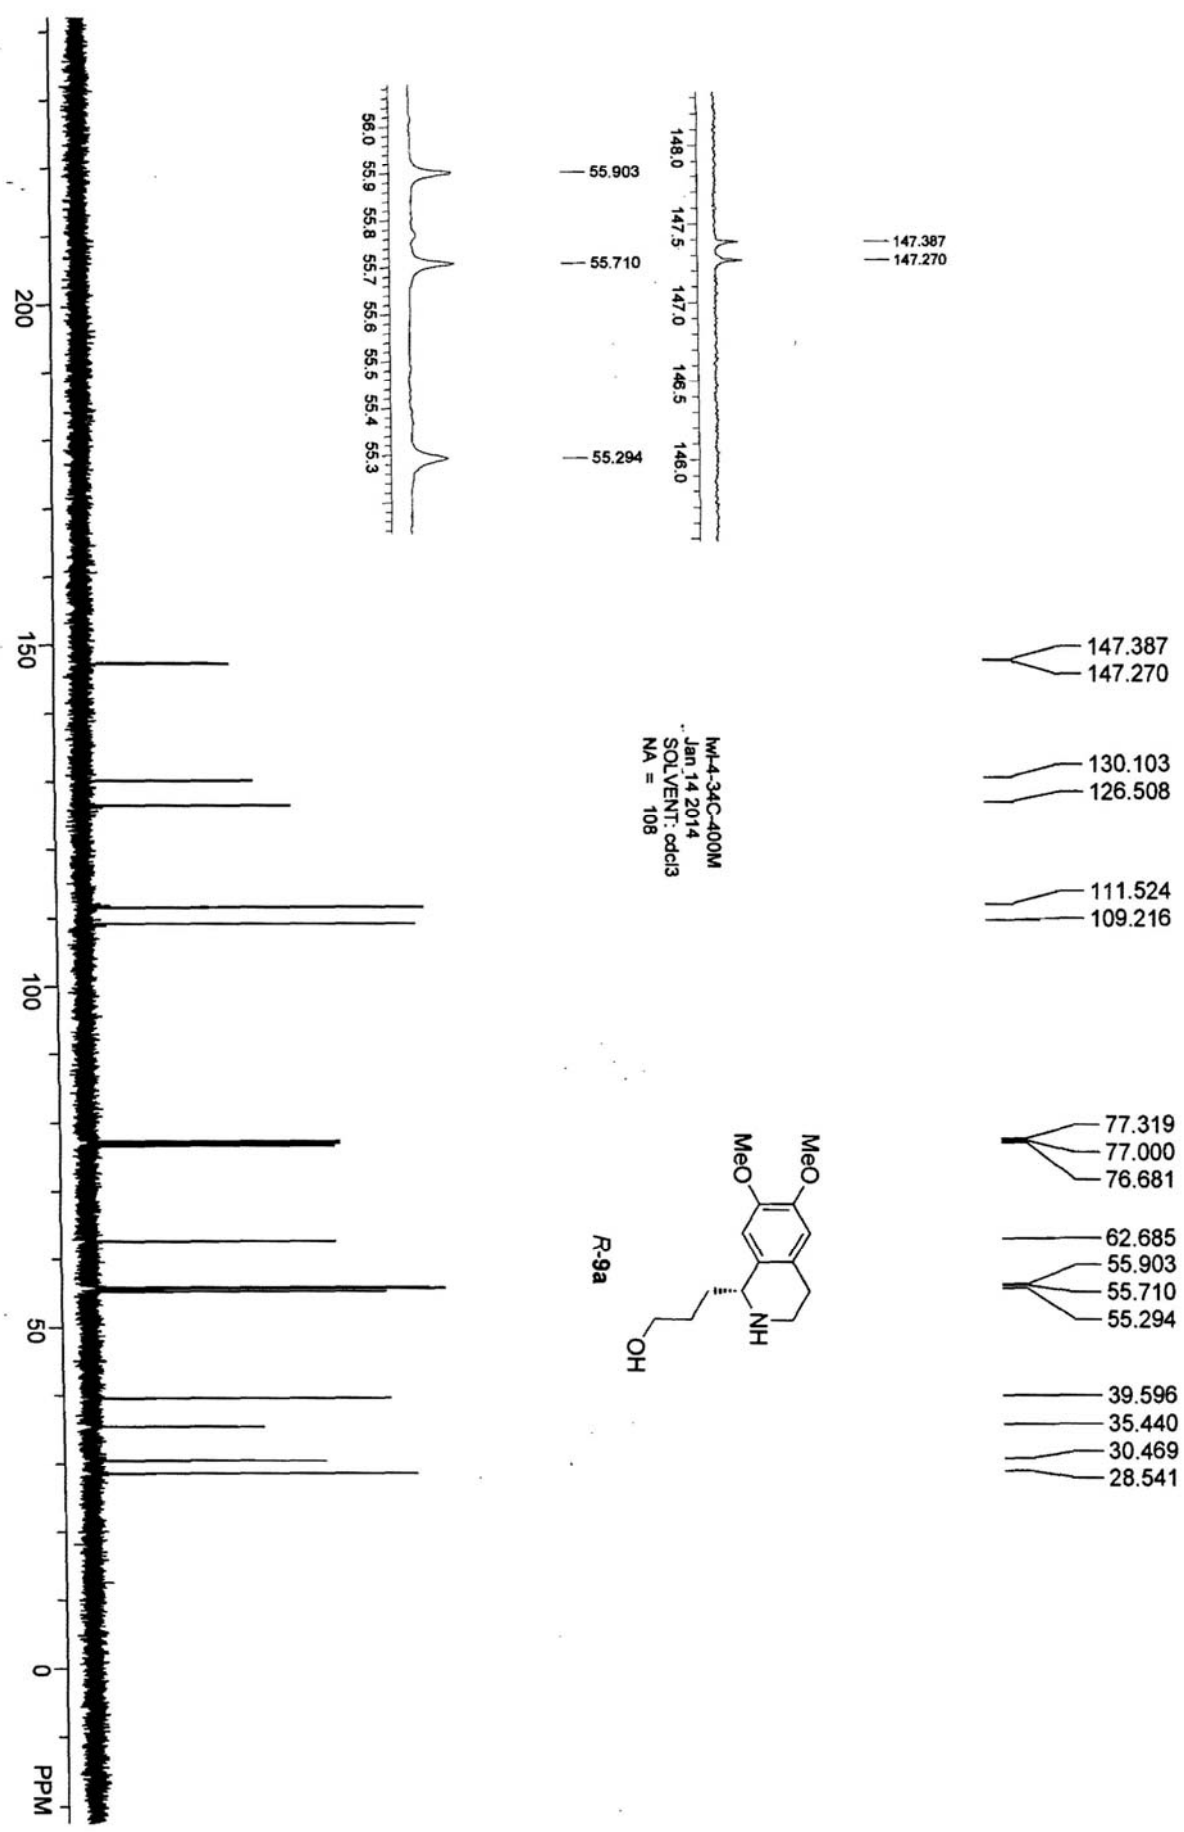

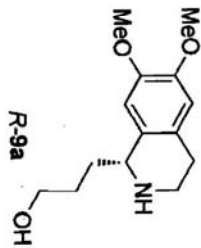

purity (95%) determined by using  
CH<sub>2</sub>Br<sub>2</sub> as the internal standard

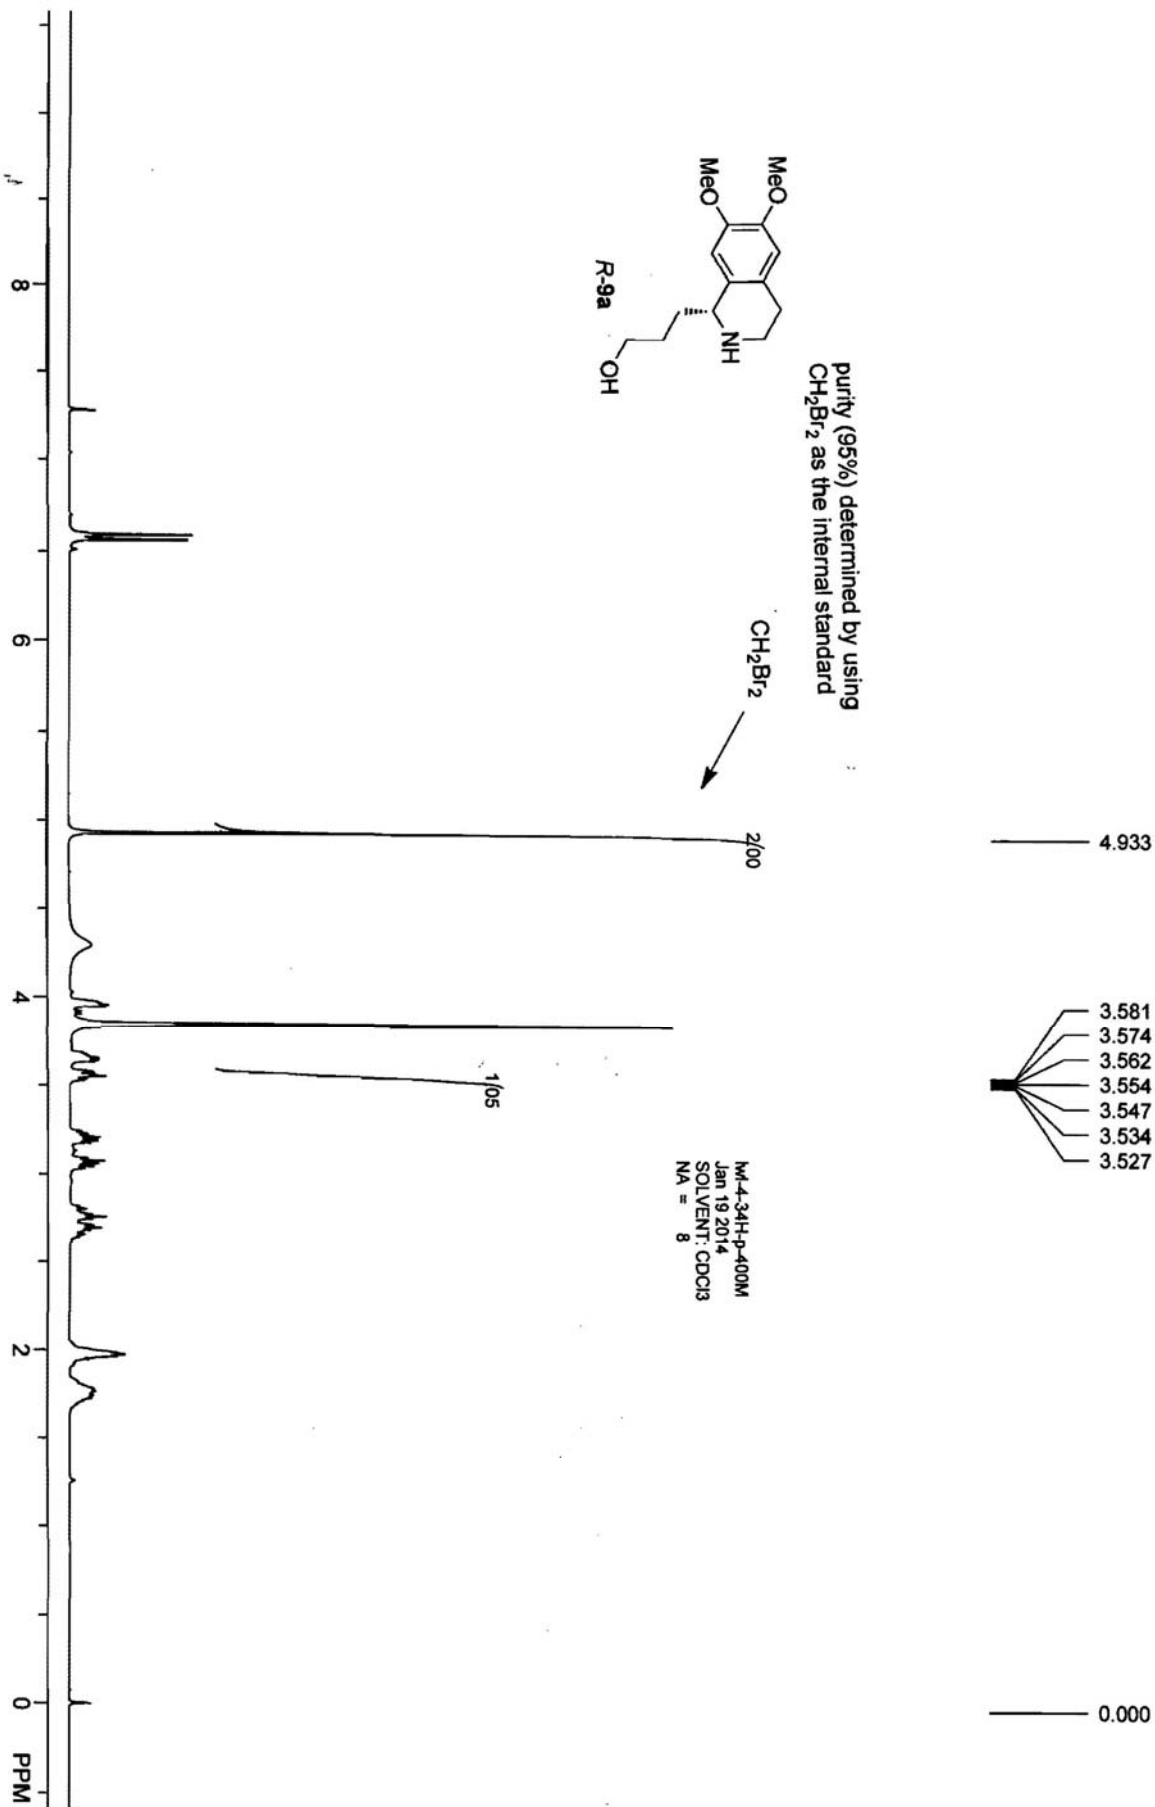

中国科学院上海有机化学研究所

Project Name: defaults for copy

Reported by User: Breeze user (Breeze)

**Breeze 2**  
HPLC System

### SAMPLE INFORMATION

|                   |                               |                  |                        |
|-------------------|-------------------------------|------------------|------------------------|
| Sample Name:      | W4-34-cd-h-80-20-0.1TEA-1-214 | Acquired By:     | Breeze                 |
| Sample Type:      | 未知                            | Date Acquired:   | 2014/1/3 16:39:12 CST  |
| Vial:             | 1                             | Acq. Method:     | zq80                   |
| Injection #:      | 25                            | Date Processed:  | 2014/1/17 16:30:19 CST |
| Injection Volume: | 10.00 $\mu$ l                 | Channel Name:    | V2489 CHA              |
| Run Time:         | 100.00 Minutes                | Sample Set Name: |                        |

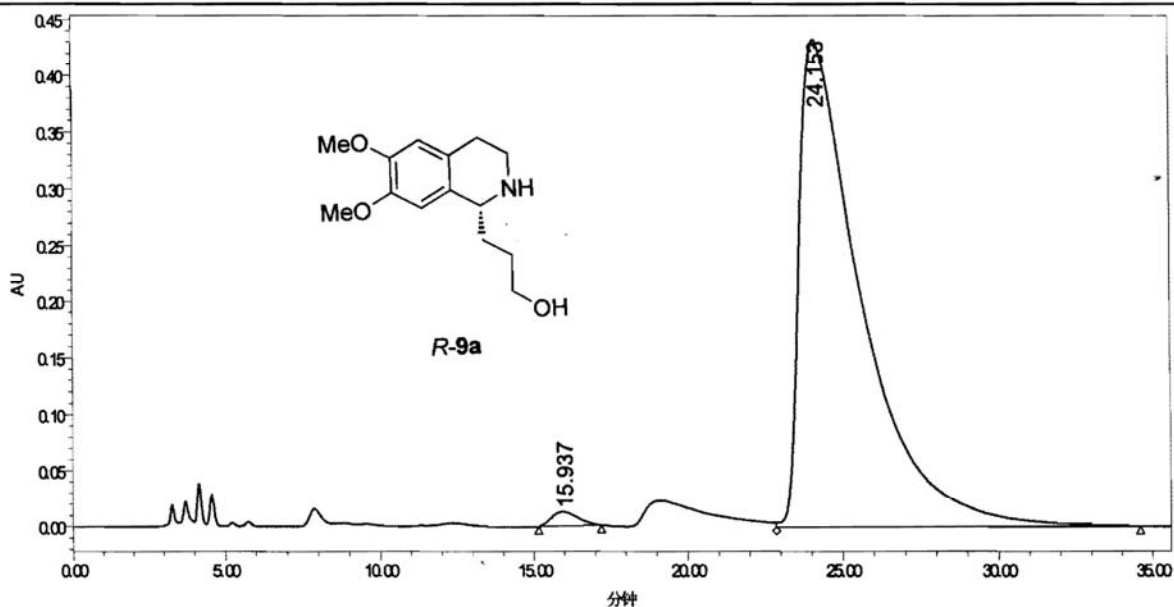

|   | RT<br>(min) | Area<br>(峰面积) | %Area | Height<br>(峰高) | %<br>Height |
|---|-------------|---------------|-------|----------------|-------------|
| 1 | 15.937      | 752792        | 1.24  | 12664          | 2.65        |
| 2 | 24.153      | 59820704      | 98.76 | 432105         | 97.15       |

Report Method: 无标题

Page: 1 (共计 1)

Printed: 2014/1/17

16:30:44 FRC



**SAMPLE INFORMATION**

|                   |                                 |                  |                       |
|-------------------|---------------------------------|------------------|-----------------------|
| Sample Name:      | lw-3-160-od-h-80-20-0.1TEA1-214 | Acquired By:     | Breeze                |
| Sample Type:      | 未知                              | Date Acquired:   | 2014/1/3 17:15:46 CST |
| Vial:             | 1                               | Acq. Method:     | zqj80                 |
| Injection #:      | 26                              | Date Processed:  | 2014/1/3 17:53:53 CST |
| Injection Volume: | 10.00 uL                        | Channel Name:    | V2489 CHA             |
| Run Time:         | 100.00 Minutes                  | Sample Set Name: |                       |

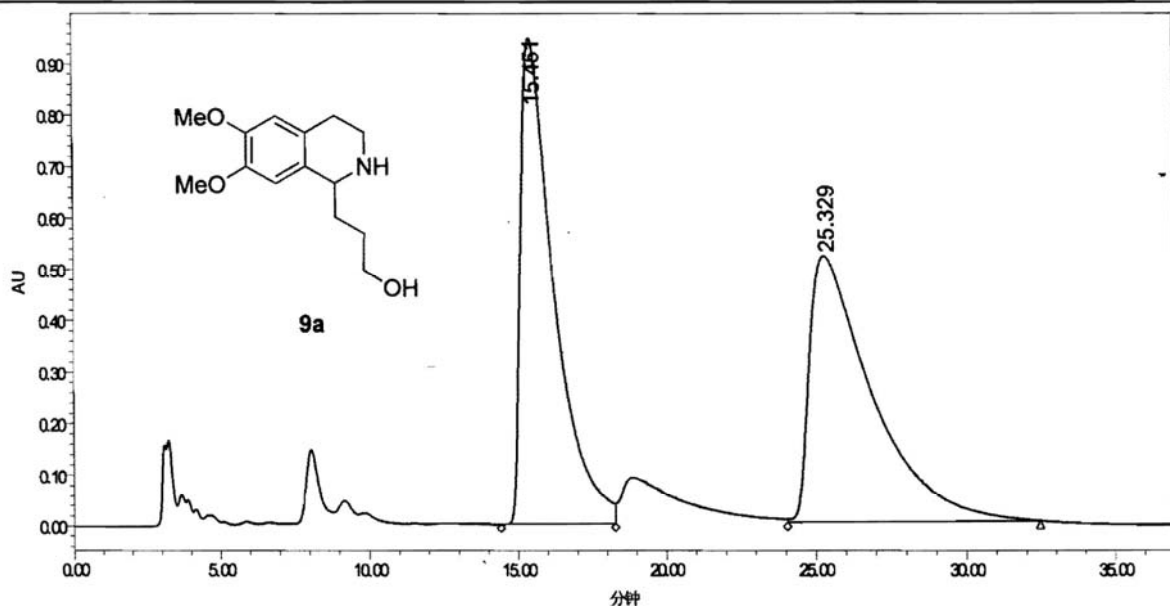

|   | RT (min) | Area (峰面积) | %Area | Height (峰高) | % Height |
|---|----------|------------|-------|-------------|----------|
| 1 | 15.451   | 73733014   | 49.53 | 947917      | 64.64    |
| 2 | 25.329   | 75139975   | 50.47 | 518692      | 35.36    |

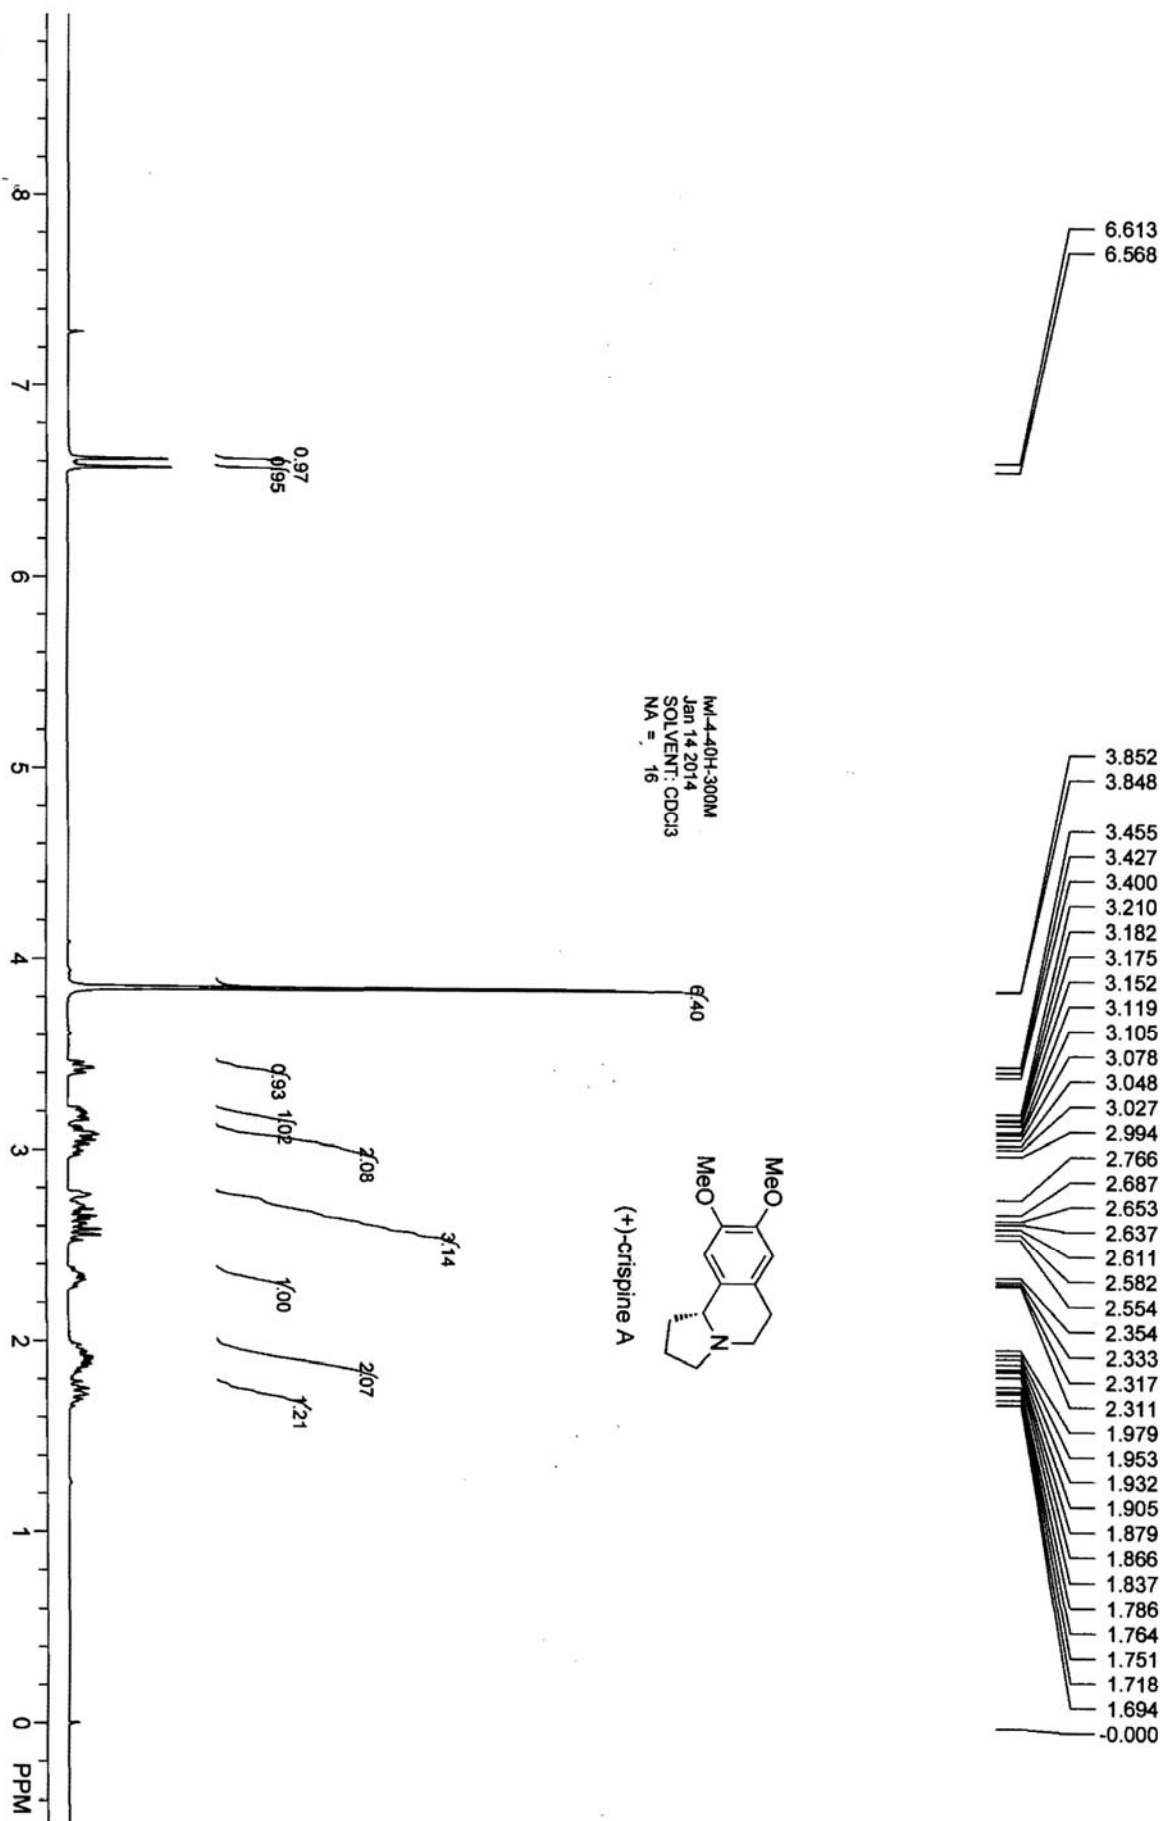

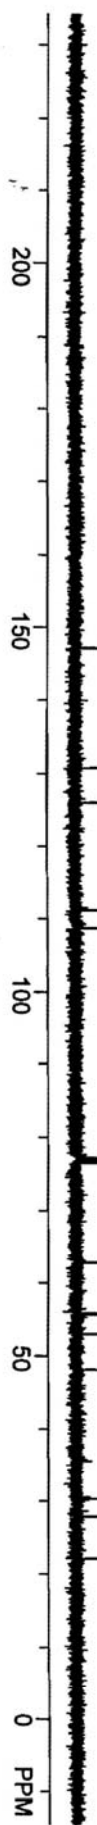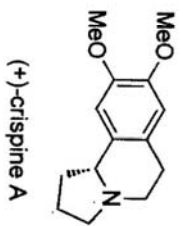

WI-4-40C-400M  
 Jan 14 2014  
 SOLVENT: cdcl3  
 NA = 184

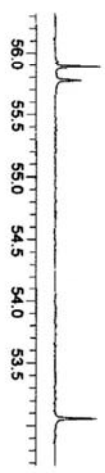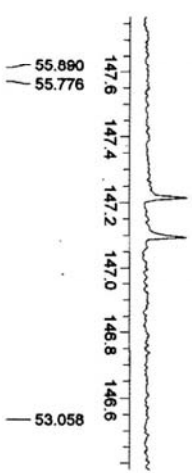

— 147.216  
 — 147.095

147.216  
 147.095

130.774  
 126.075

111.190  
 108.692

77.319  
 77.000  
 76.681

62.850  
 55.890  
 55.776  
 53.058  
 48.253

30.384  
 27.940  
 22.125

**SAMPLE INFORMATION**

|                   |                          |                  |                        |
|-------------------|--------------------------|------------------|------------------------|
| Sample Name:      | lw-4-40-cd-h-80-20-1-214 | Acquired By:     | Breeze                 |
| Sample Type:      | 未知                       | Date Acquired:   | 2014/1/10 15:50:17 CST |
| Vial:             | 1                        | Acq. Method:     | zq80                   |
| Injection #:      | 52                       | Date Processed:  | 2014/1/10 16:18:07 CST |
| Injection Volume: | 10.00 ul                 | Channel Name:    | V2489 ChA              |
| Run Time:         | 60.00 Minutes            | Sample Set Name: |                        |

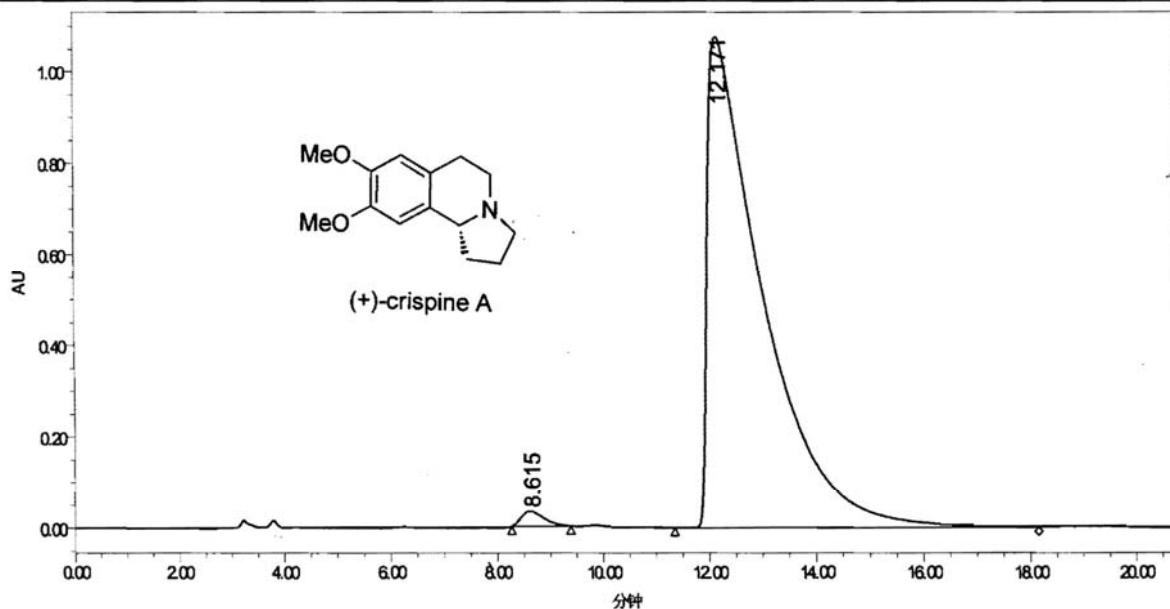

|   | RT (min) | Area (峰sec) | %Area | Height (峰) | % Height |
|---|----------|-------------|-------|------------|----------|
| 1 | 8.615    | 971727      | 1.24  | 32966      | 2.97     |
| 2 | 12.171   | 77683130    | 98.76 | 1076236    | 97.03    |

**SAMPLE INFORMATION**

|                   |                           |                  |                        |
|-------------------|---------------------------|------------------|------------------------|
| Sample Name:      | hw-3-163-cd-h-80-20-1-214 | Acquired By:     | Breeze                 |
| Sample Type:      | 未知                        | Date Acquired:   | 2014/1/10 15:23:35 CST |
| Vial:             | 1                         | Acq. Method:     | zgj80                  |
| Injection #:      | 51                        | Date Processed:  | 2014/1/10 16:18:18 CST |
| Injection Volume: | 10.00 ul                  | Channel Name:    | V2189 ChA              |
| Run Time:         | 60.00 Minutes             | Sample Set Name: |                        |

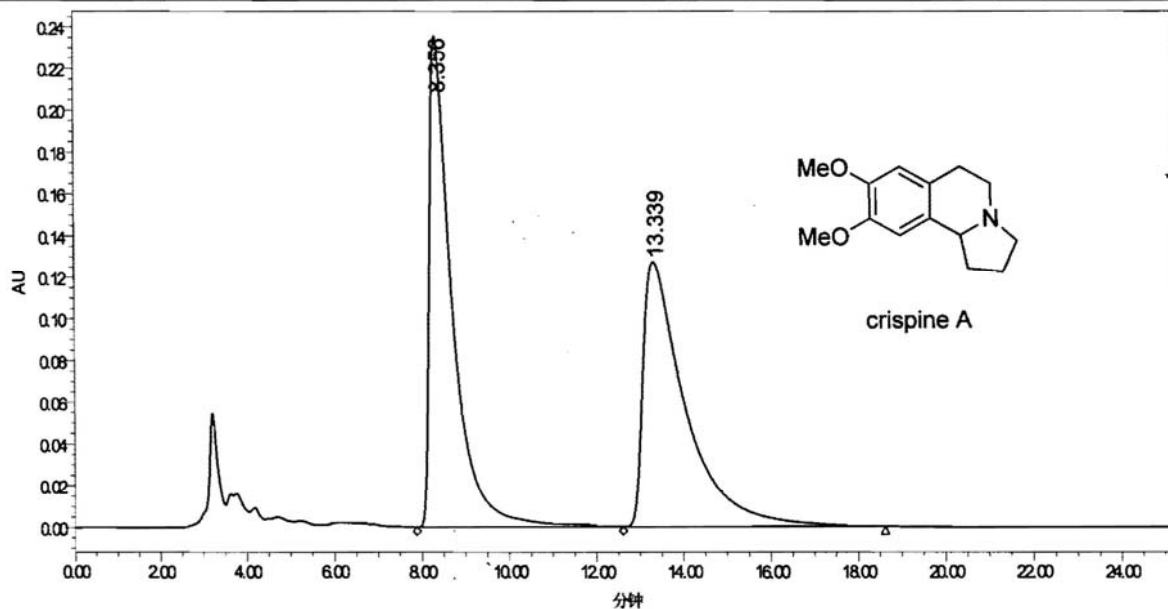

|   | RT (min) | Area (峰面积) | %Area | Height (峰高) | % Height |
|---|----------|------------|-------|-------------|----------|
| 1 | 8.366    | 8575062    | 50.03 | 235531      | 64.93    |
| 2 | 13.339   | 8563113    | 49.97 | 127261      | 35.07    |
